# Supplementary material for: Highly diastereoselective cascade [5 + 1] double Michael reaction, a route for the synthesis of spiro(thio)oxindoles
Source: PubMed Central journal article supplement (PMC8613191; doi:10.1038/s41598-021-01766-6), 2021-11-24
Supplement: 41598_2021_1766_MOESM1_ESM.pdf [file 41598_2021_1766_MOESM1_ESM.pdf]

## *Supporting Information*

# **Highly Diastereoselective Cascade [5+1] Double Michael Reaction, a Route for the Synthesis of Spiro(thio)oxindoles**

Firouz Matloubi Moghaddam<sup>1\*</sup>, Vahid Saberi<sup>1</sup>, Ashkan Karimi<sup>1,2</sup>

<sup>1</sup> Laboratory of Organic Synthesis and Natural Products, Department of Chemistry,  
Sharif University of Technology, 111559516 Tehran, Iran

<sup>2</sup> Department of Chemistry, McGill University, H3A-0B8 Montreal, Canada

### Table of contents

|    |                                         |     |
|----|-----------------------------------------|-----|
| 1. | Figures and tables .....                | S2  |
| 2. | NMR spectra .....                       | S4  |
| 3. | Crystallography data .....              | S24 |
| 5. | Cartesian coordinates and energies..... | S36 |

## Figures and tables:

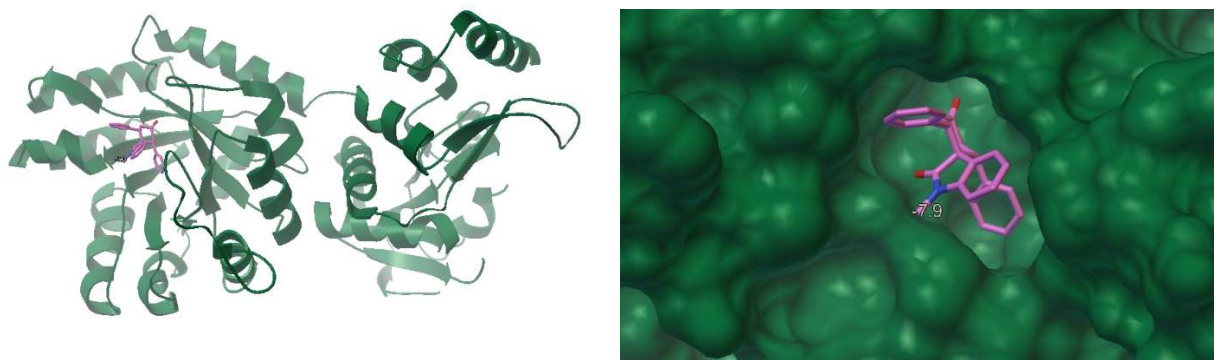

**Figure S1.** Interaction between *cis*-spiro oxindole **2** with OPRT domain of the LdUMPS (PDB ID: 2WNS). The figure is drawn using UCSF chimera 1.8.

**Table S1.** Electronic energy (Hartree) of *cis/trans* spiro oxindole and thiooxindole **1-4** calculated using B3LYP/6-31+G(d) in gas phase.

|                                                                                    |                                                                                    |                                                                                    |                                                                                      |
|------------------------------------------------------------------------------------|------------------------------------------------------------------------------------|------------------------------------------------------------------------------------|--------------------------------------------------------------------------------------|
| 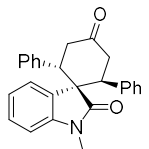 |  |  |  |
| <b>1</b>                                                                           | <b>2</b>                                                                           | <b>3</b>                                                                           | <b>4</b>                                                                             |
| -1203.218 Hartree                                                                  | -1203.209 Hartree                                                                  | -1524.616 Hartree                                                                  | -1524.624 Hartree                                                                    |

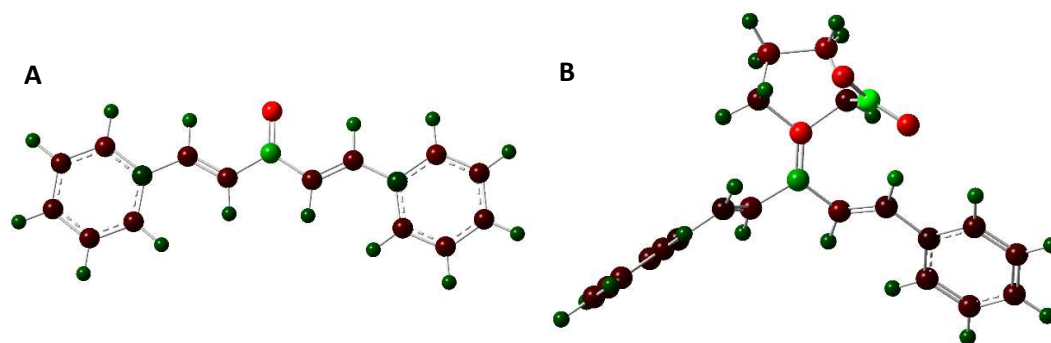

**Figure S2.** Mulliken charge distribution on (A) dibenzal ketone and (B) dibenzal iminium the product of reaction of L-proline with dibenzal ketone. Calculations were performed using B3LYP/6-31G(d) in gas phase.

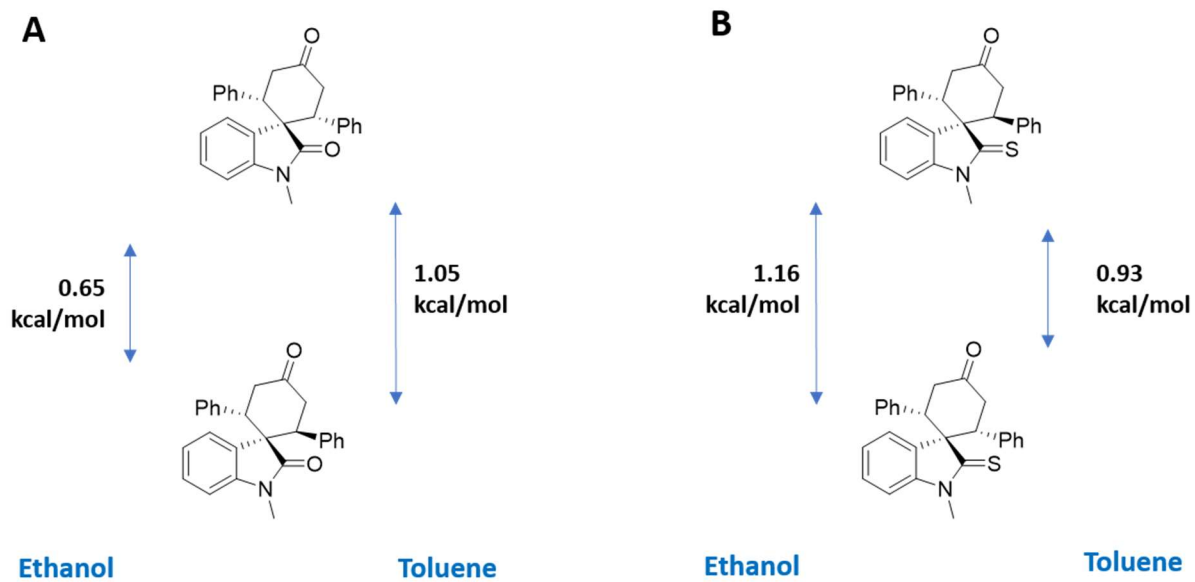

**Figure S3.** The energy diagram of *cis* and *trans* (A) oxindole (B) thiooxindole in ethanol and toluene.

# NMR spectra:

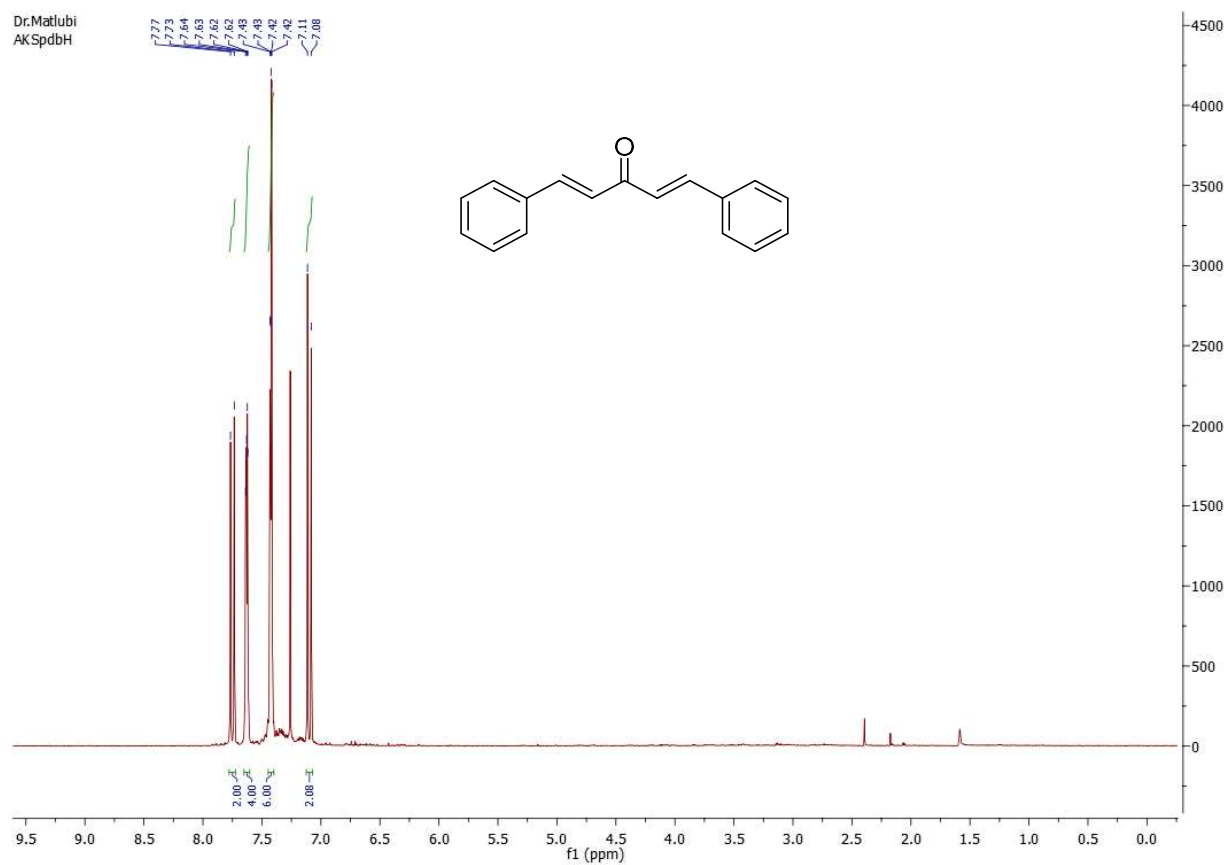

$^1\text{H}$  NMR spectrum ( $\text{CDCl}_3$ , 500 MHz)

Dr.Matlubi  
AKSpdb

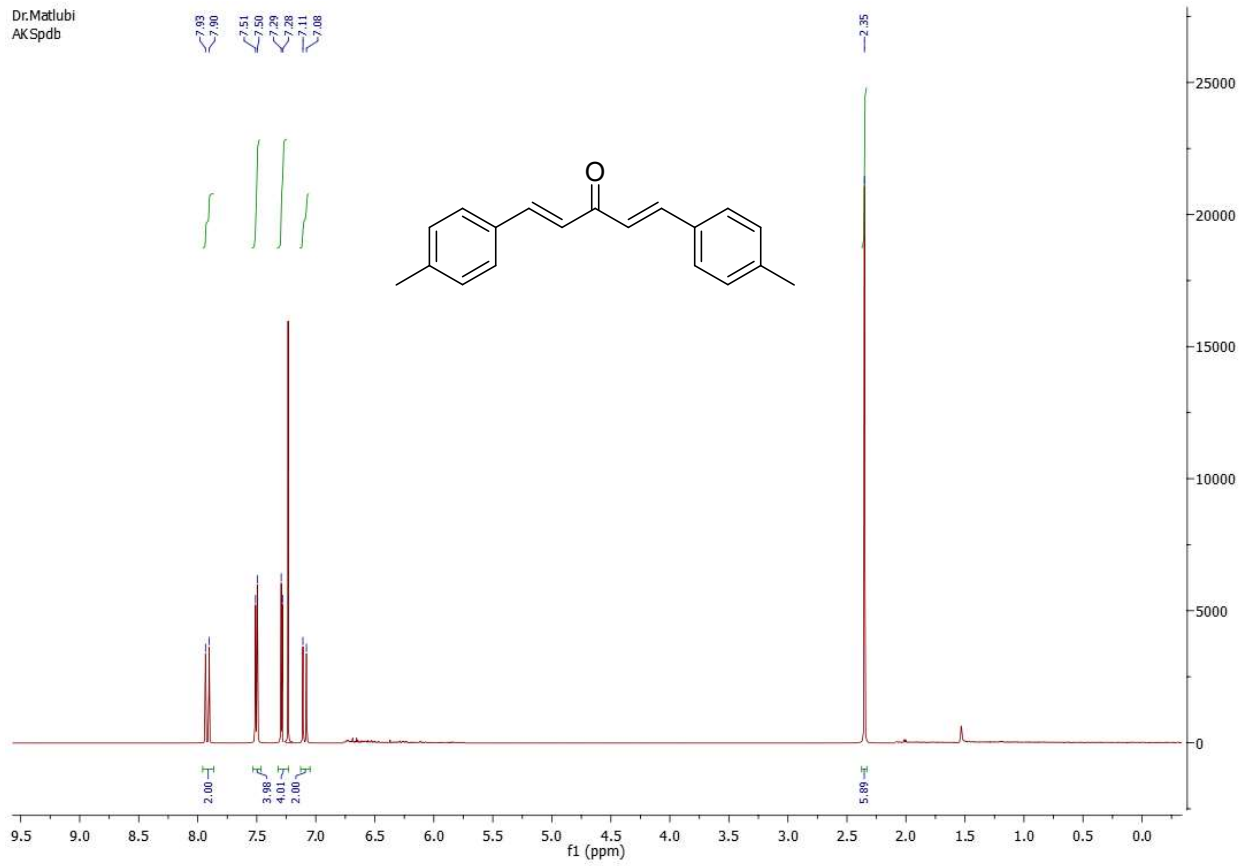

$^1\text{H}$  NMR spectrum ( $\text{CDCl}_3$ , 500 MHz)

Dr.Matlubi  
AKSP2

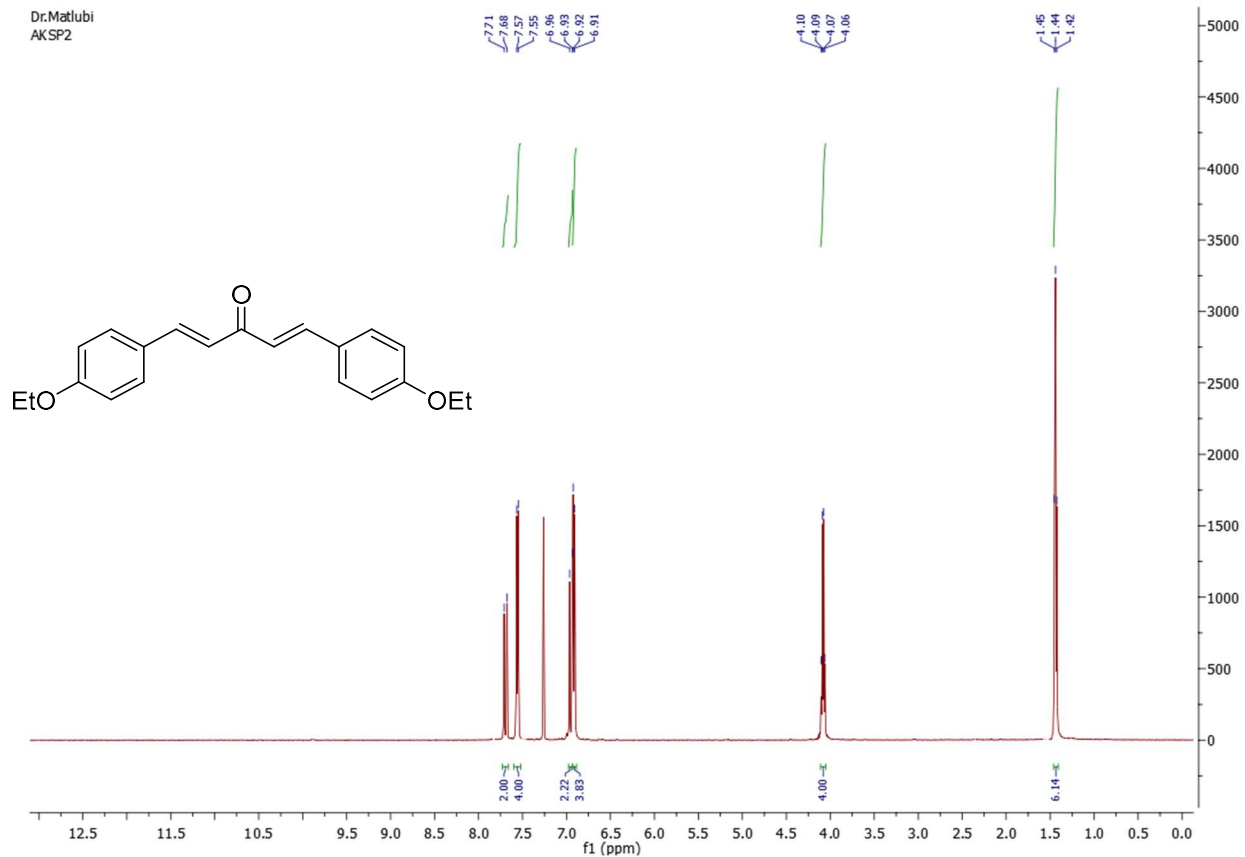

<sup>1</sup>H NMR spectrum (CDCl<sub>3</sub>, 500 MHz)

Dr.Matubi  
AKSP11

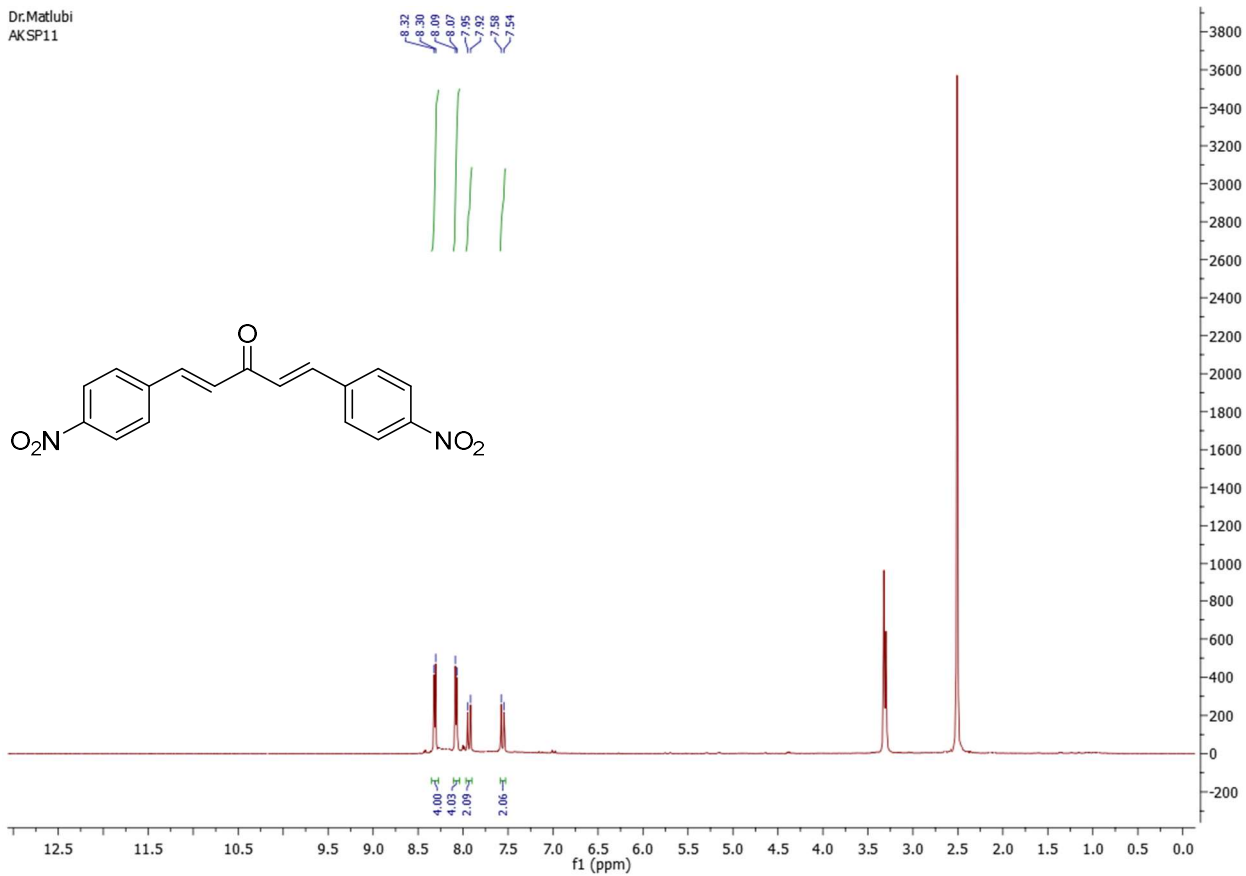

<sup>1</sup>H NMR spectrum (d<sub>6</sub>-DMSO, 500 MHz)

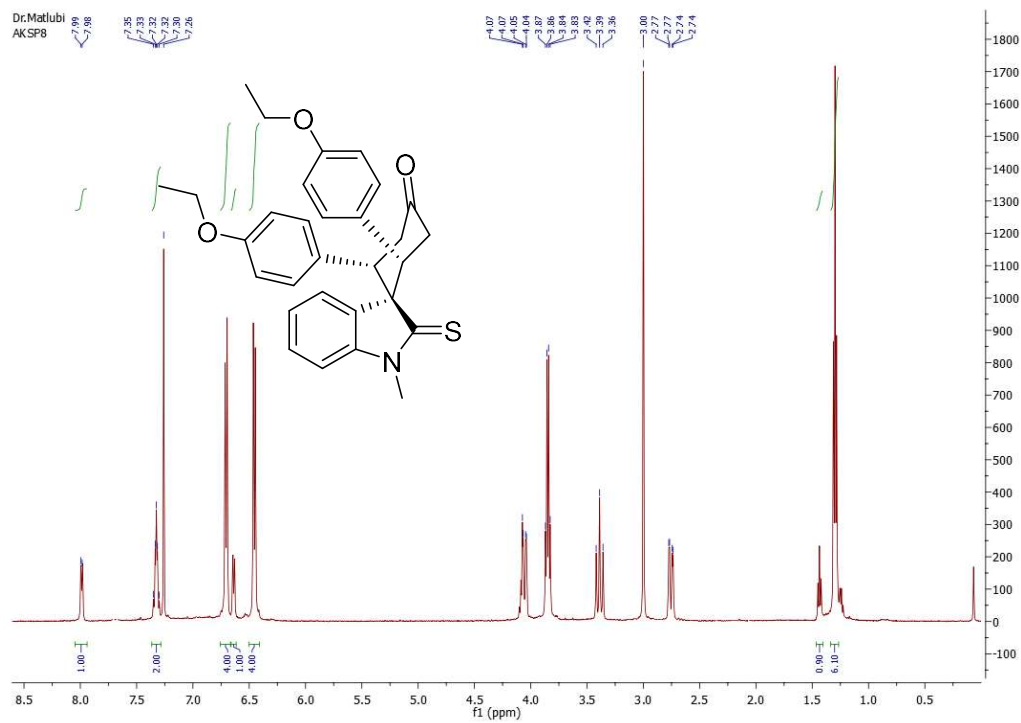

$^1\text{H}$  NMR spectrum ( $\text{CDCl}_3$ , 500 MHz)

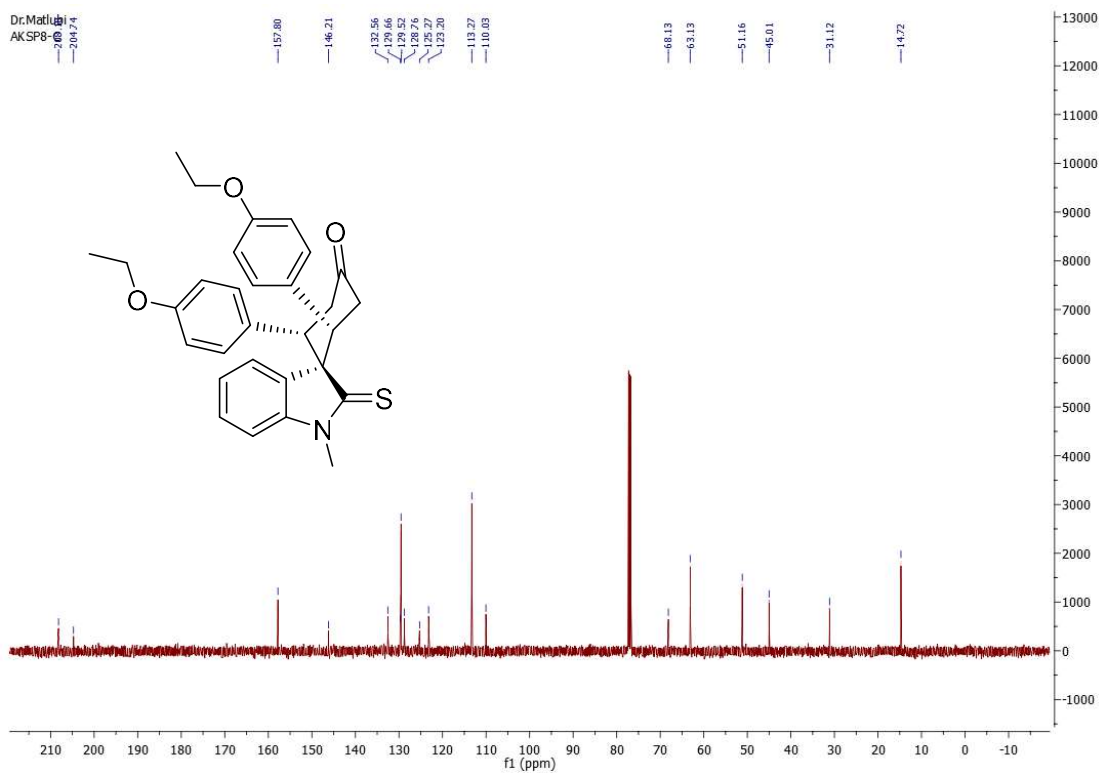

$^{13}\text{C}$  NMR spectrum ( $\text{CDCl}_3$ , 125.8 MHz)



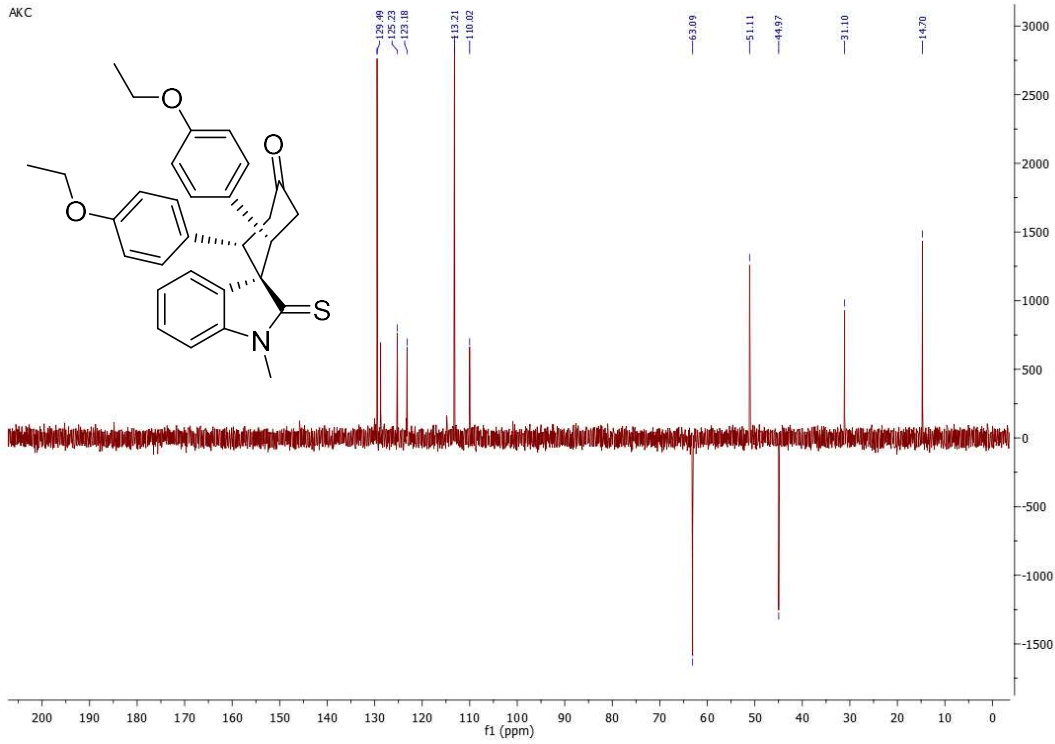

DEPT 135

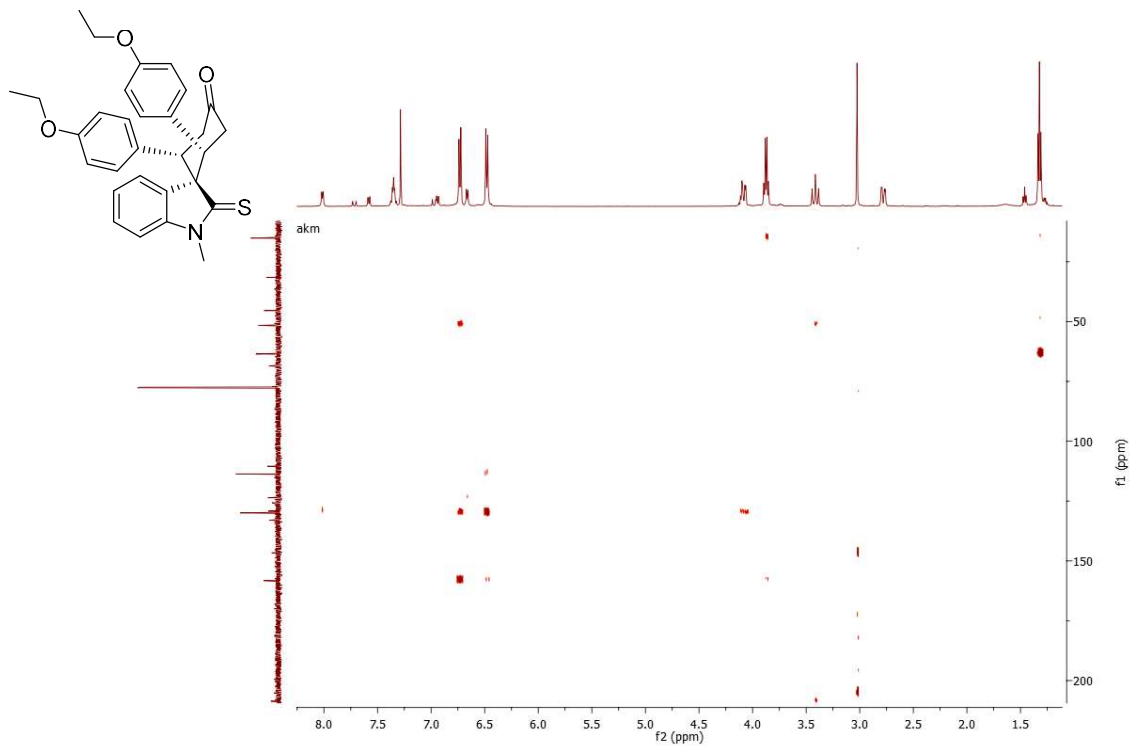

HMBC

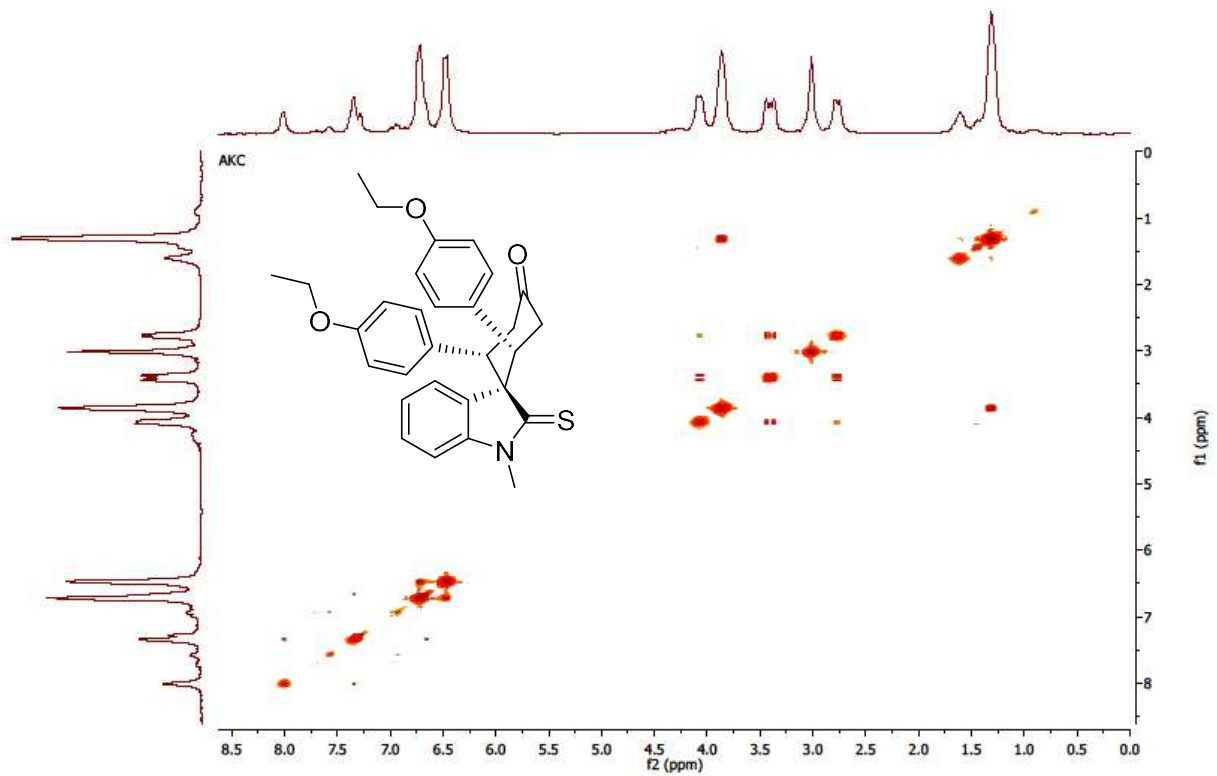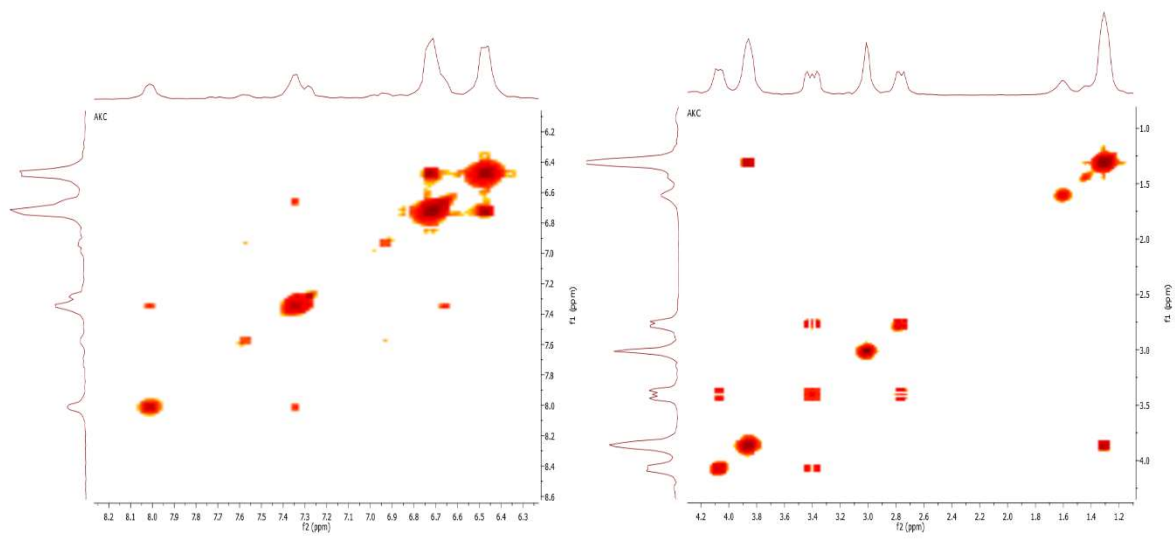

COSY

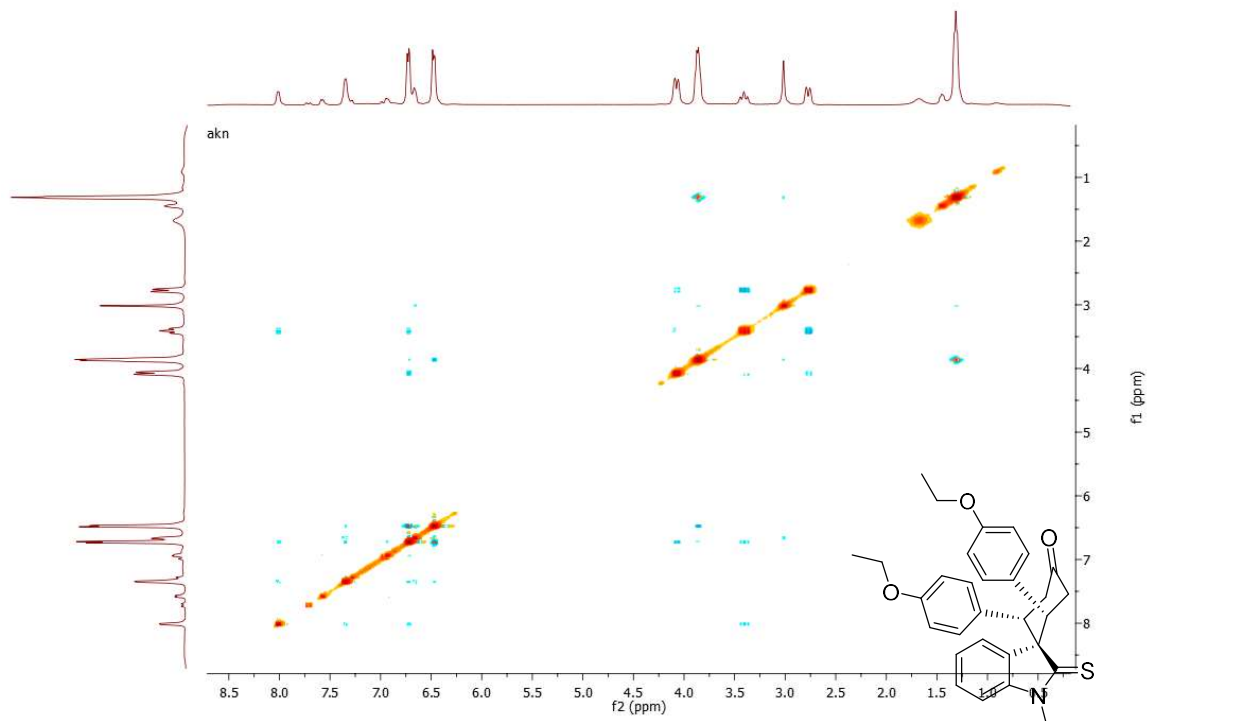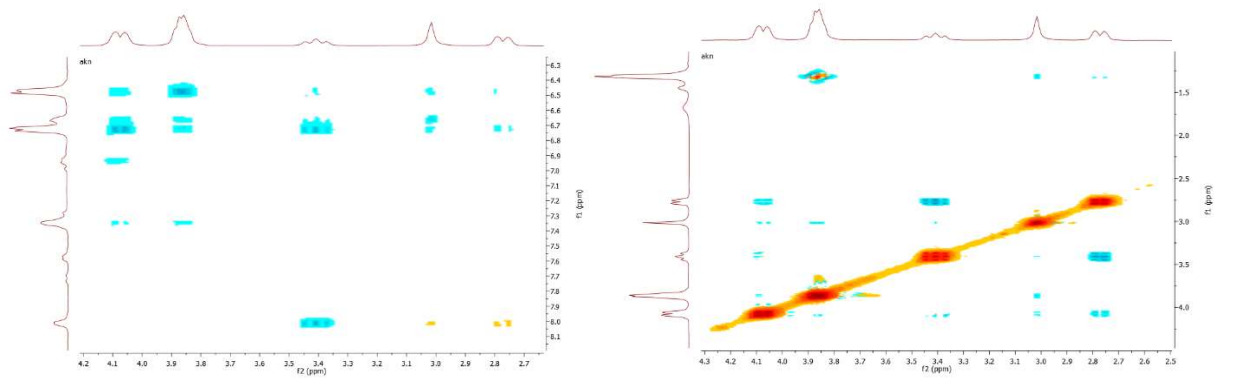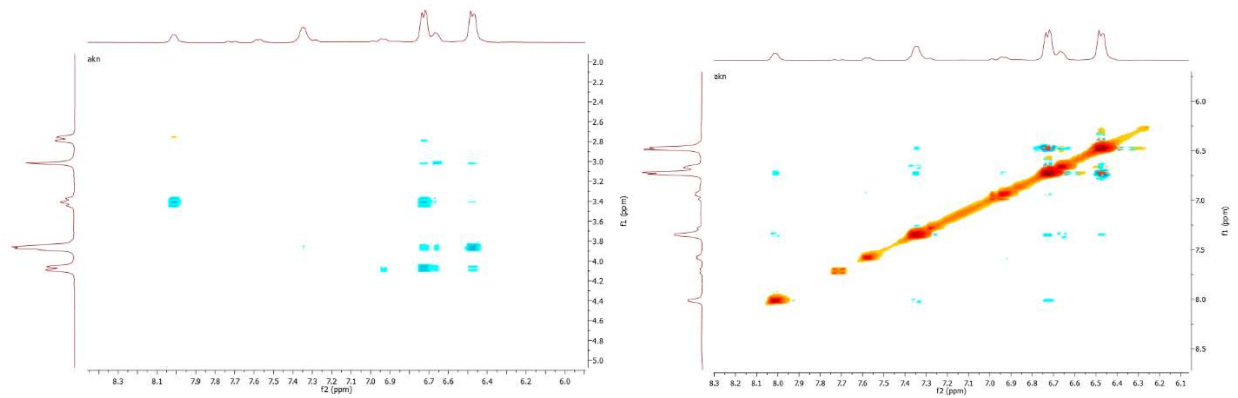

NOESY

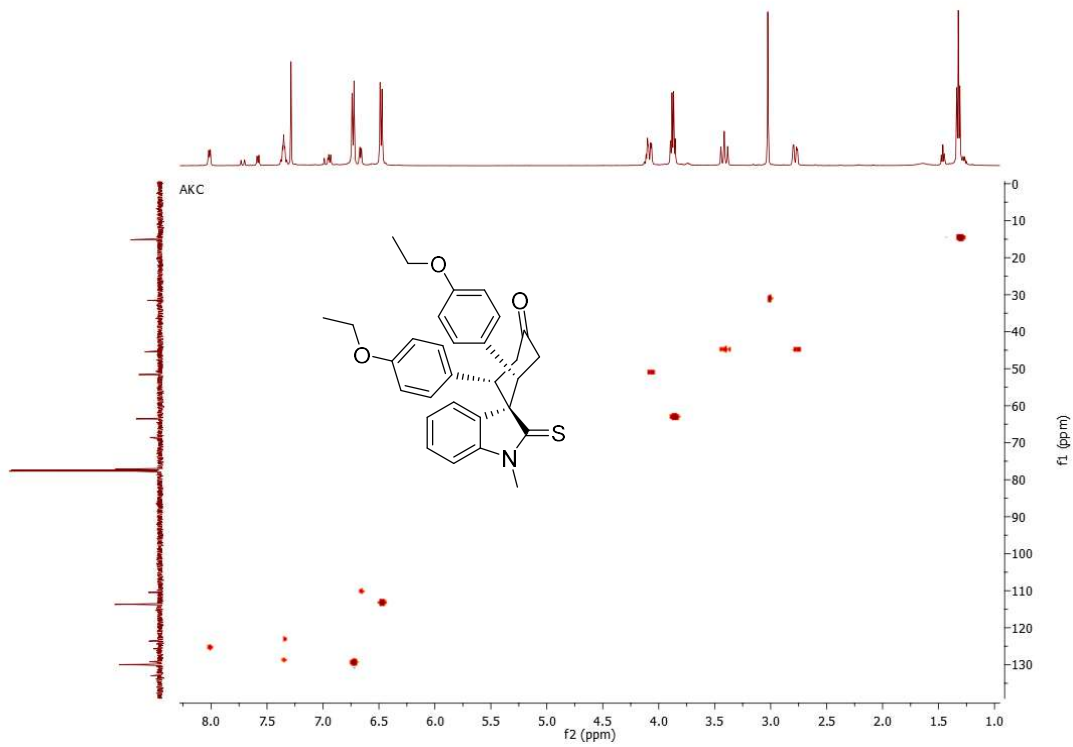

HSQC

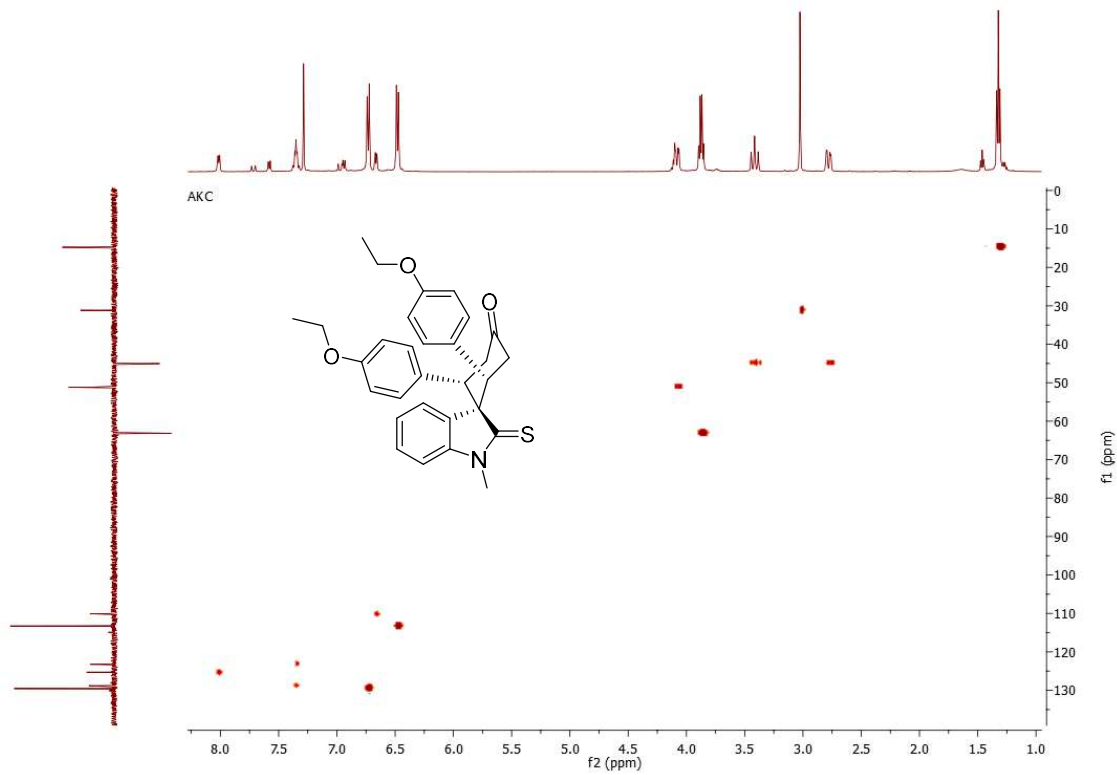

HSQC (on DEPT 135)

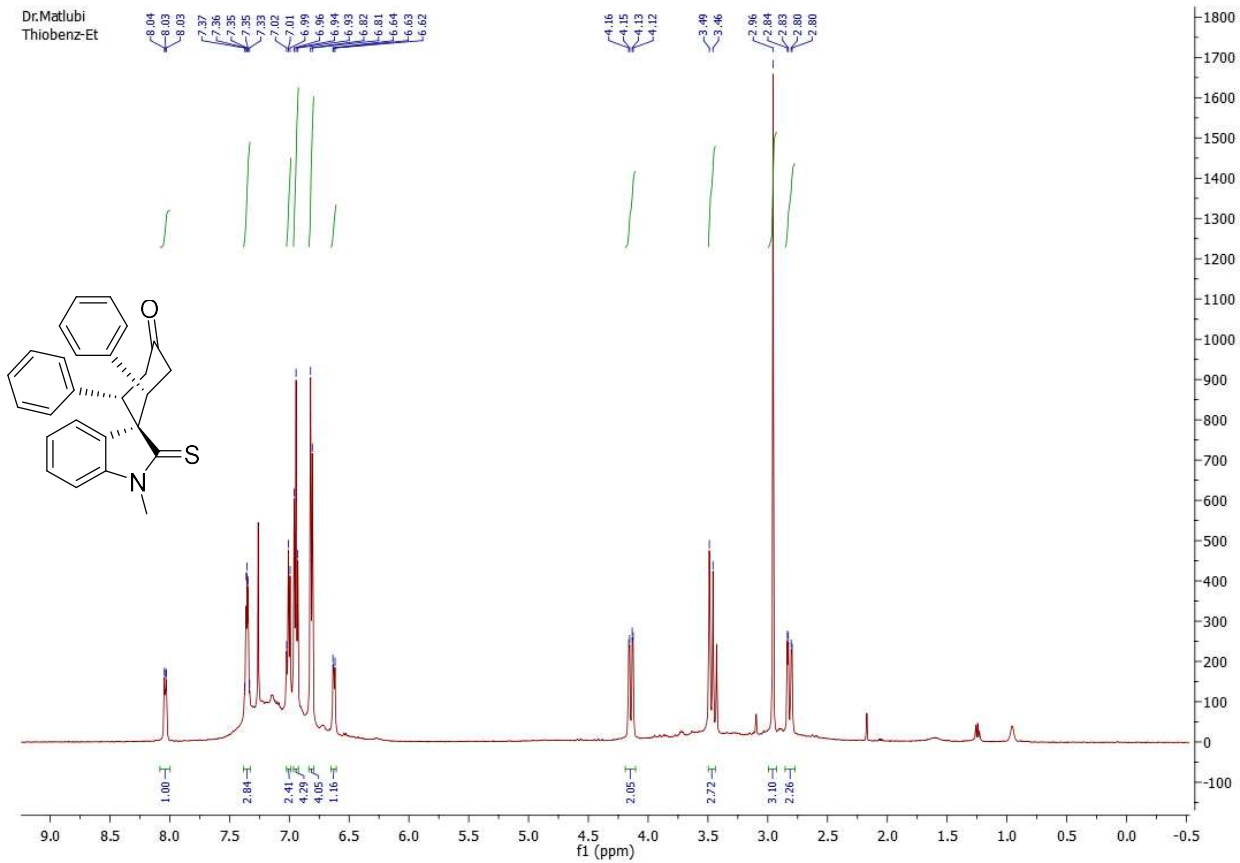

$^1\text{H}$  NMR spectrum ( $\text{CDCl}_3$ , 500 MHz)

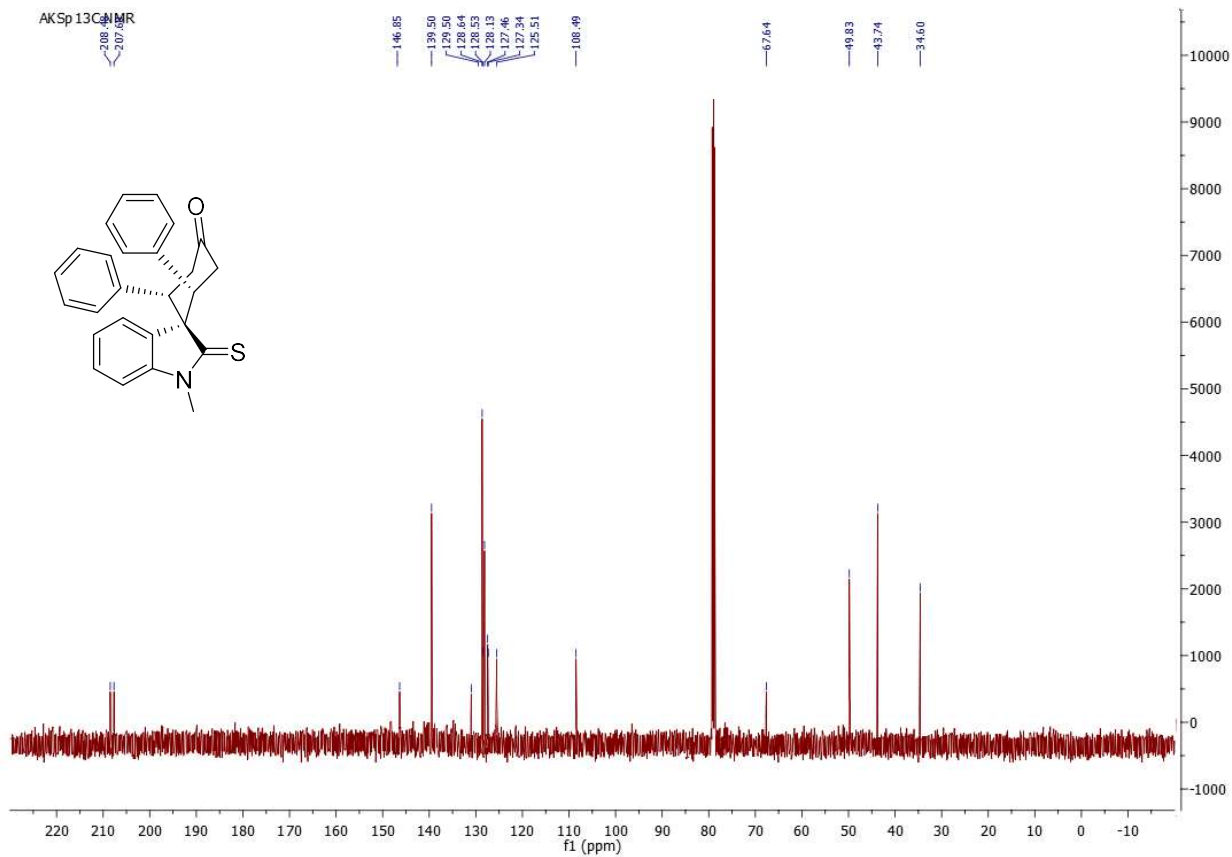

$^{13}\text{C}$  NMR spectrum ( $\text{CDCl}_3$ , 125.8 MHz)

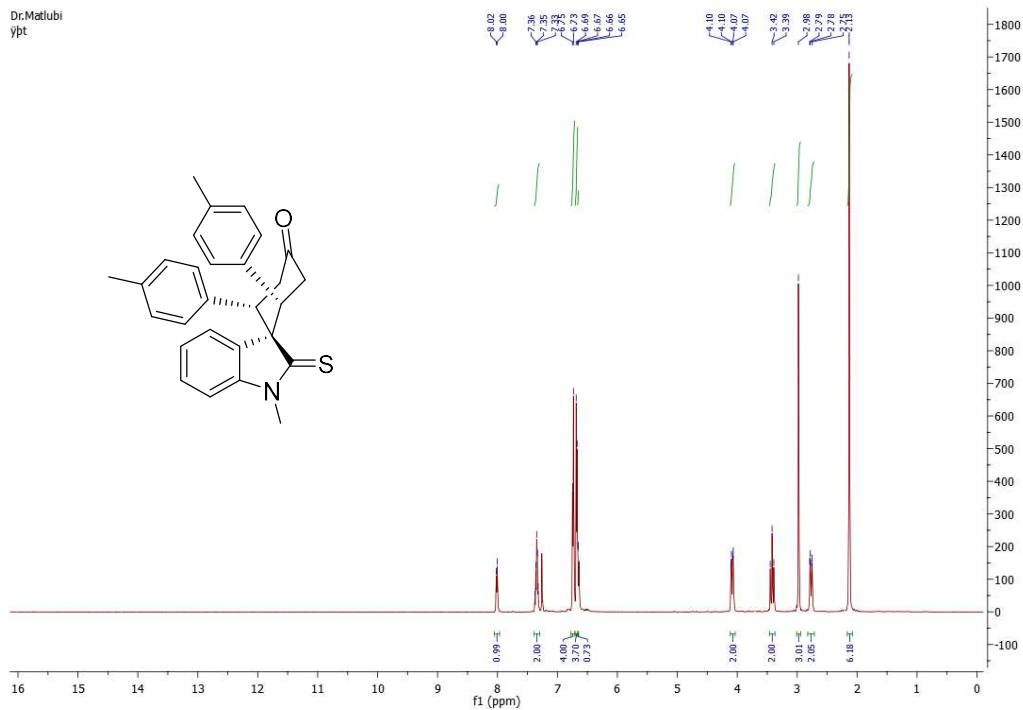

$^1\text{H}$  NMR spectrum (CDCl<sub>3</sub>, 500 MHz)

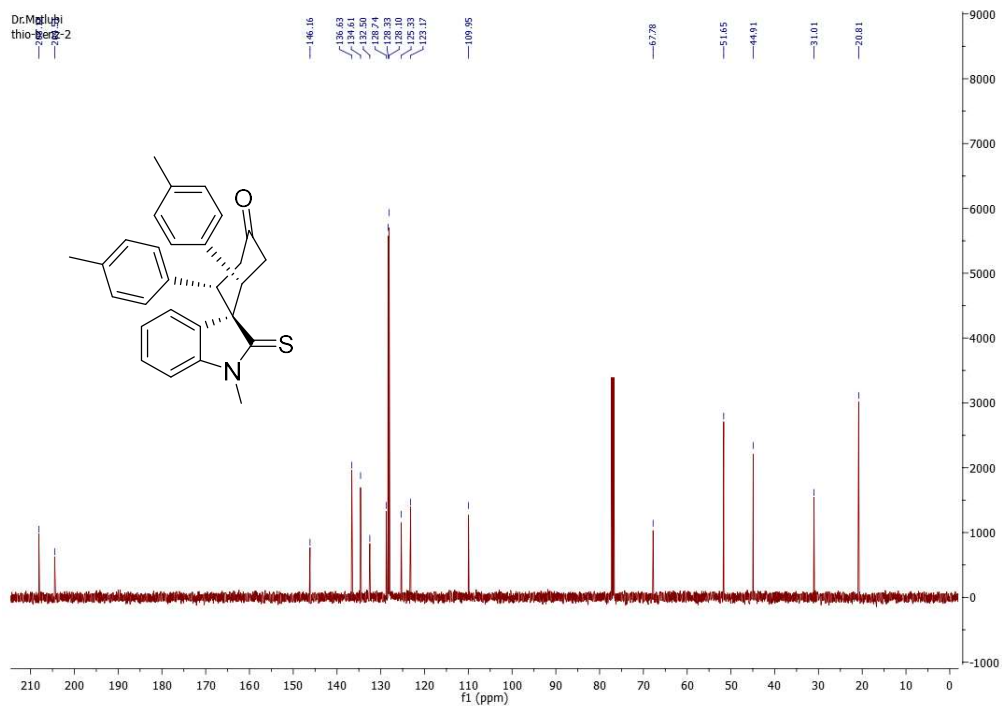

$^{13}\text{C}$  NMR spectrum (CDCl<sub>3</sub>, 125.8 MHz)

Dr. Matlubi  
bt

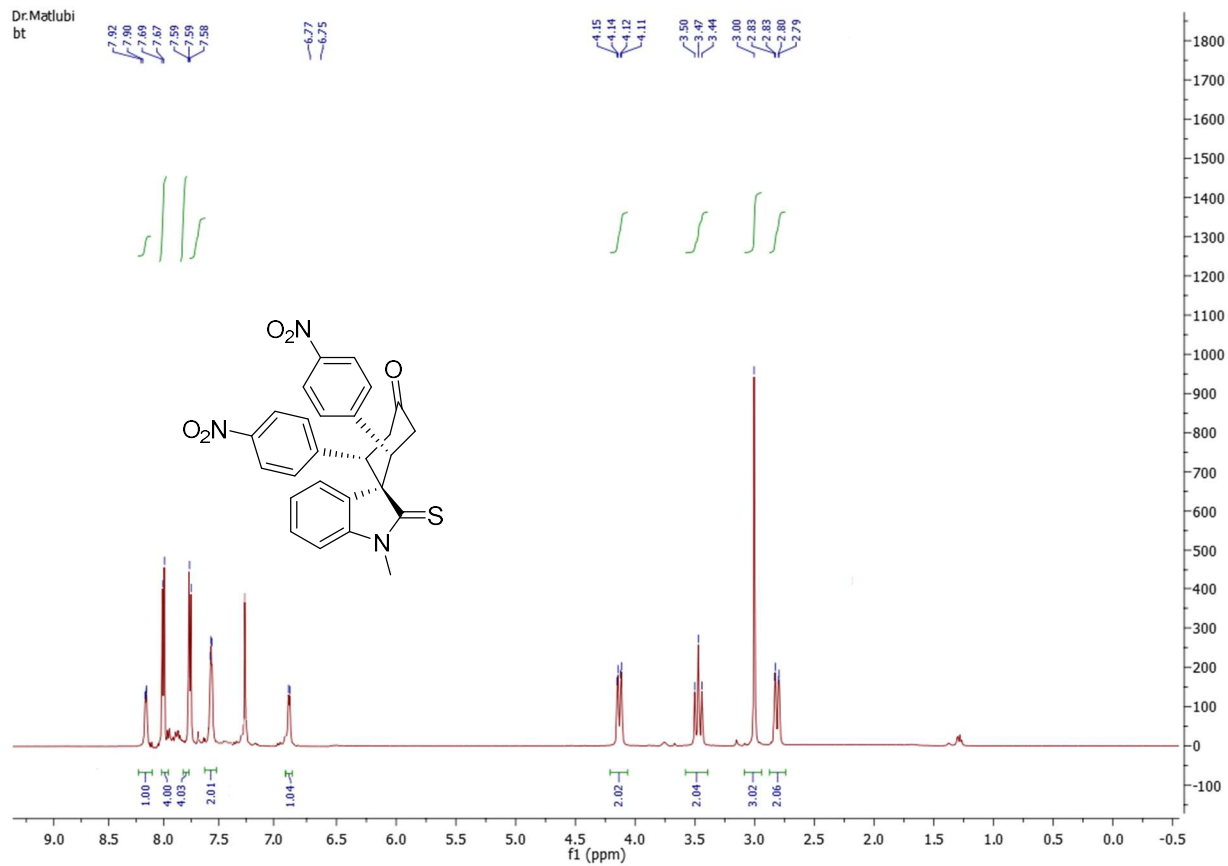

$^1\text{H}$  NMR spectrum ( $\text{CDCl}_3$ , 500 MHz)



Dr.Matlubi 13C NMR  
AKSp2

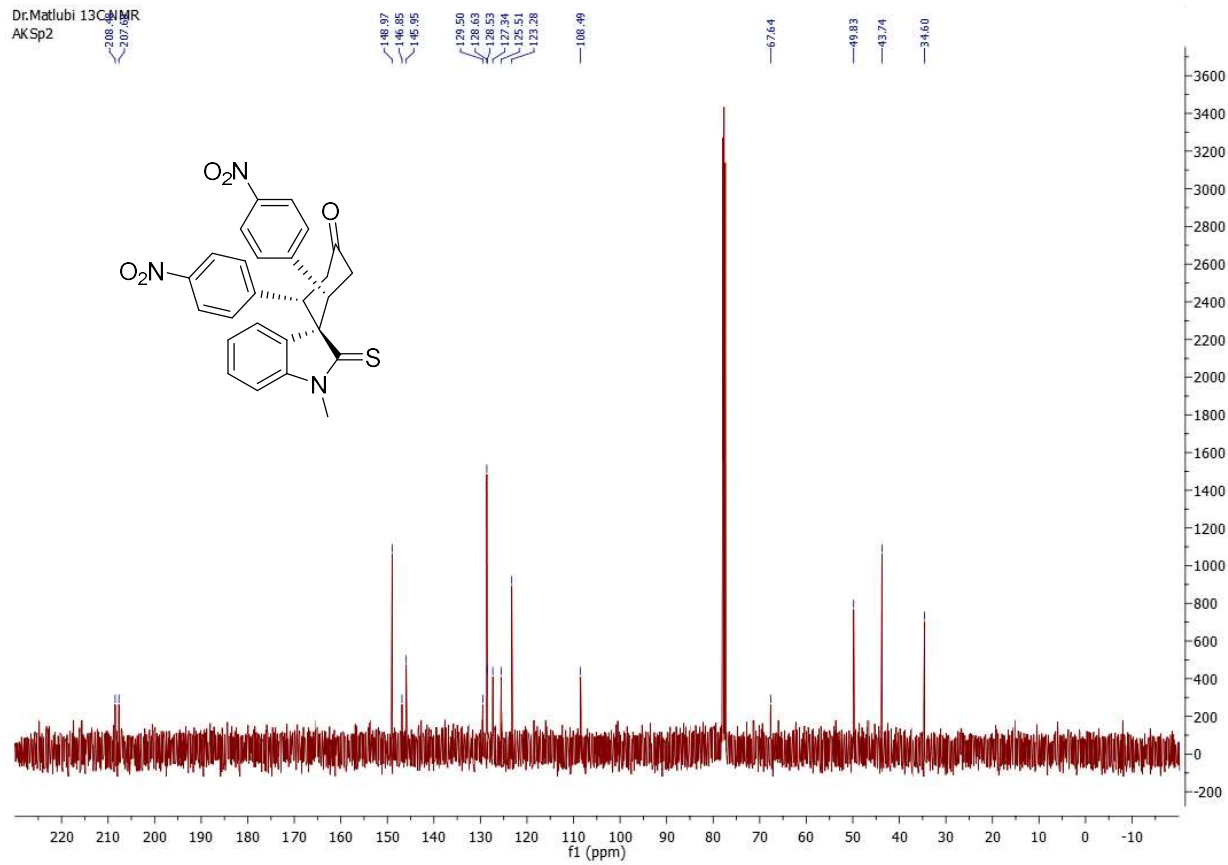

<sup>13</sup>C NMR spectrum (CDCl<sub>3</sub>, 125.8 MHz)

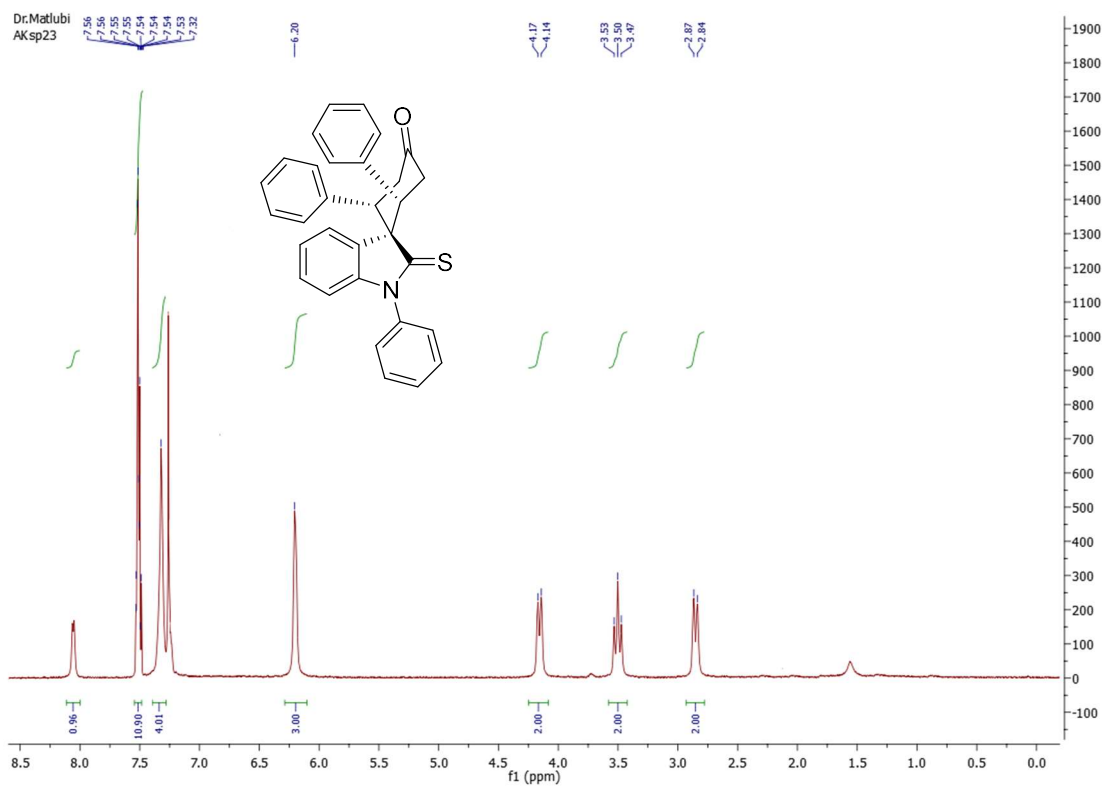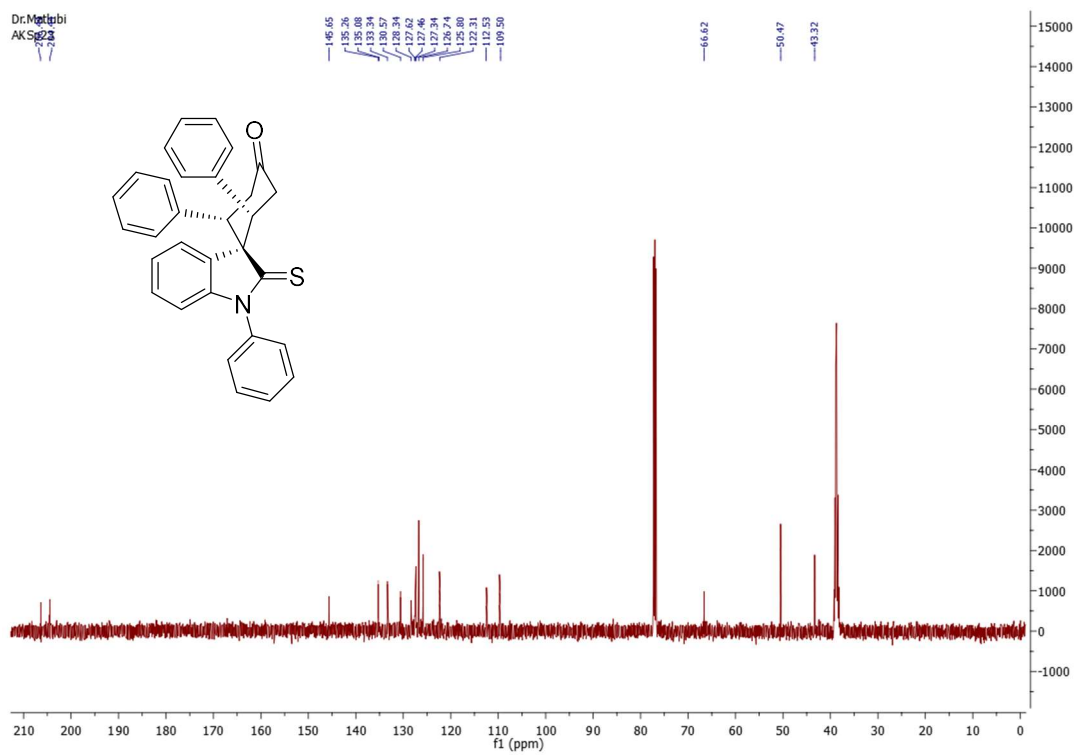

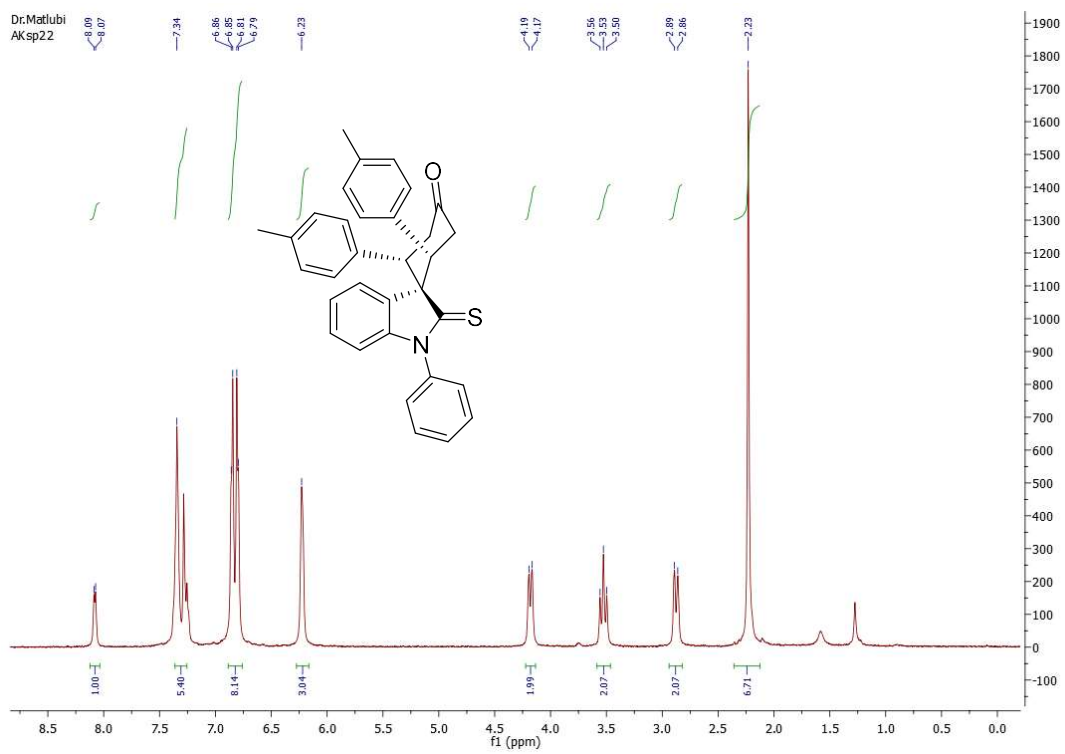

$^1\text{H}$  NMR spectrum ( $\text{CDCl}_3$ , 500 MHz)

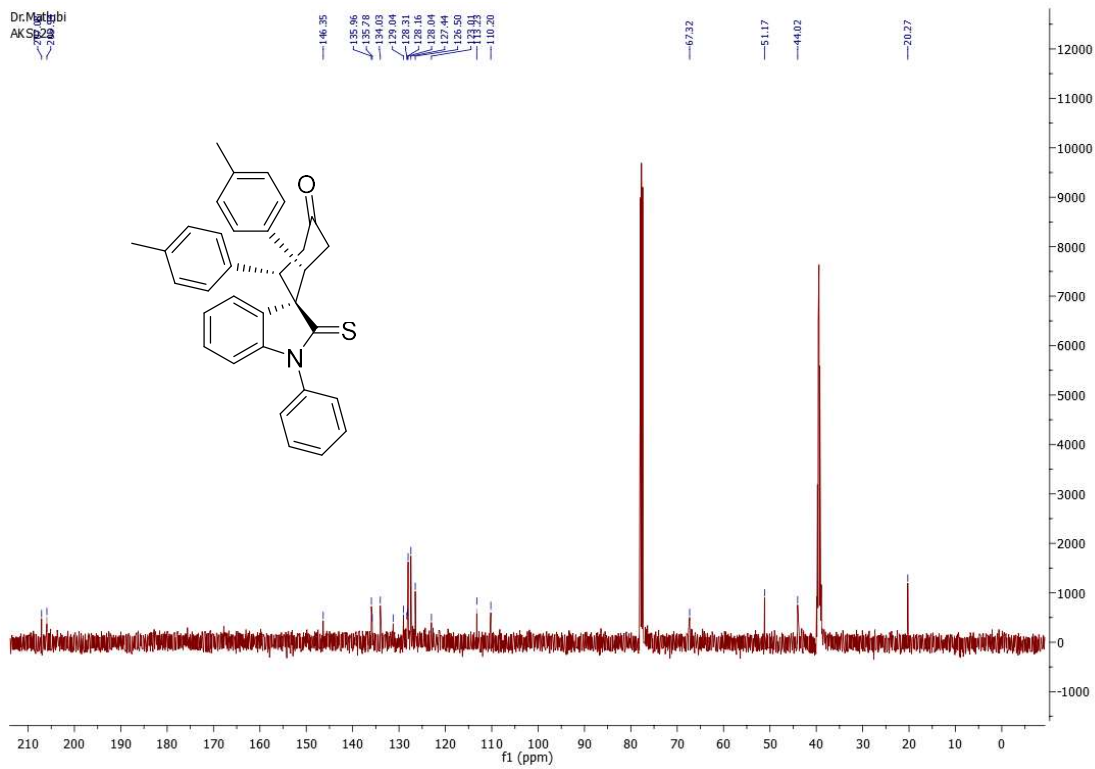

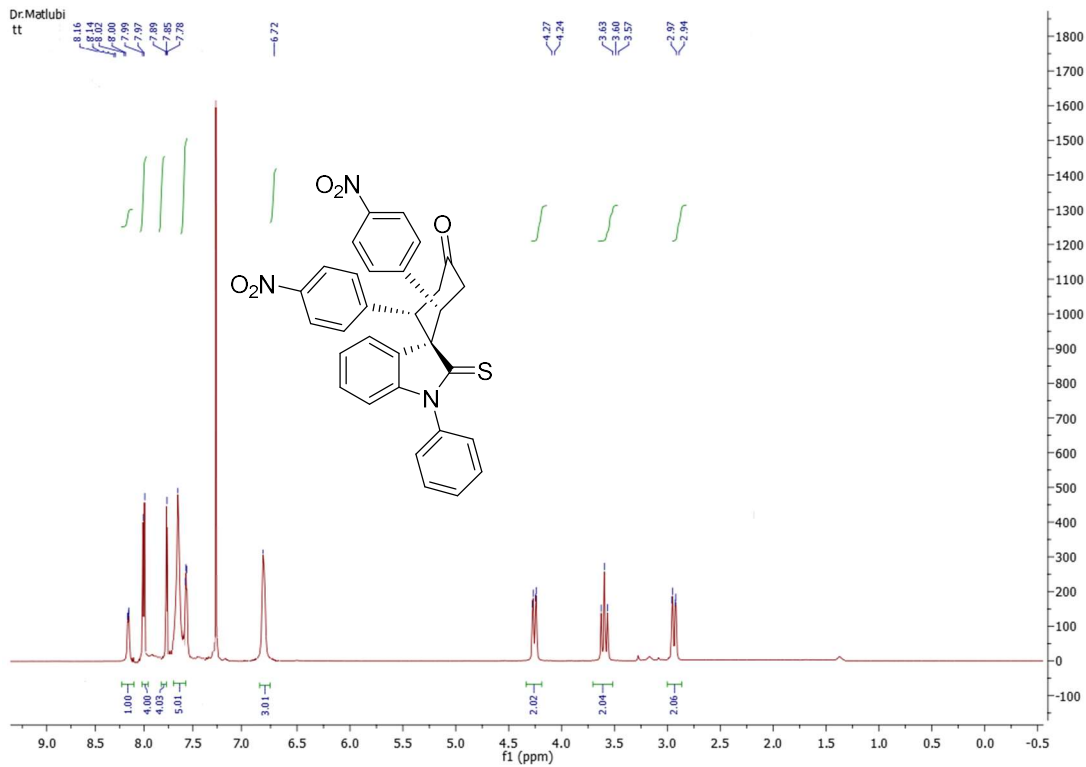

$^1\text{H}$  NMR spectrum ( $\text{CDCl}_3$ , 500 MHz)

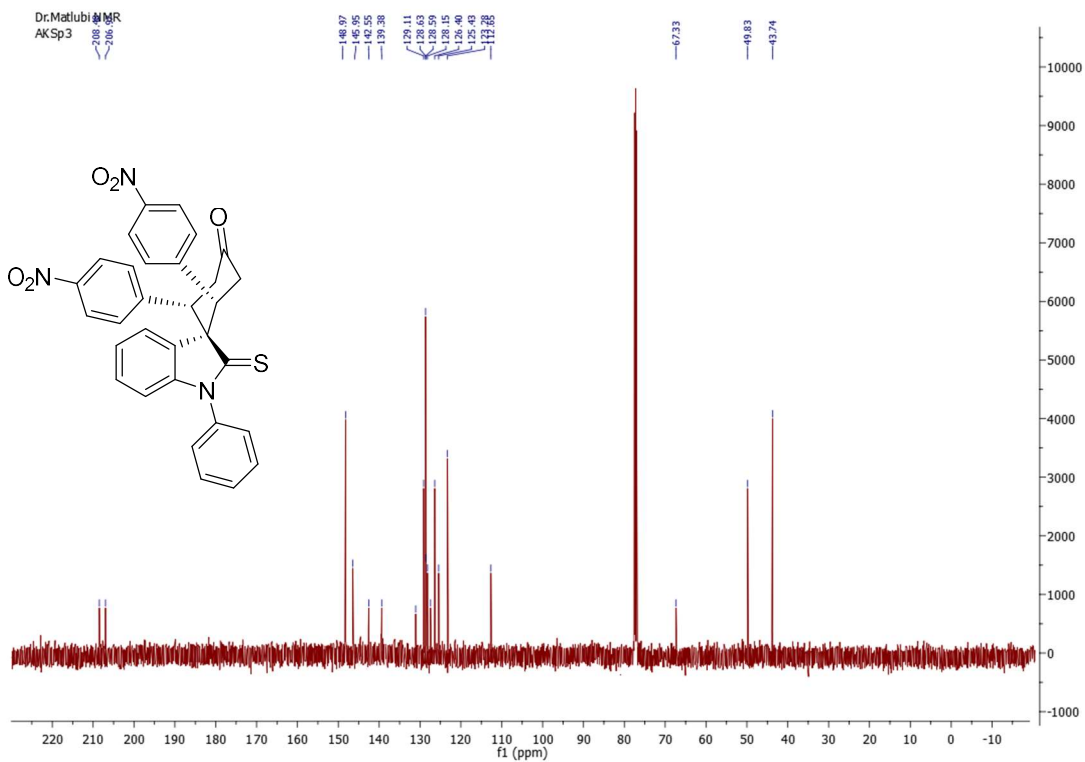

$^{13}\text{C}$  NMR spectrum ( $\text{CDCl}_3$ , 125.8 MHz)

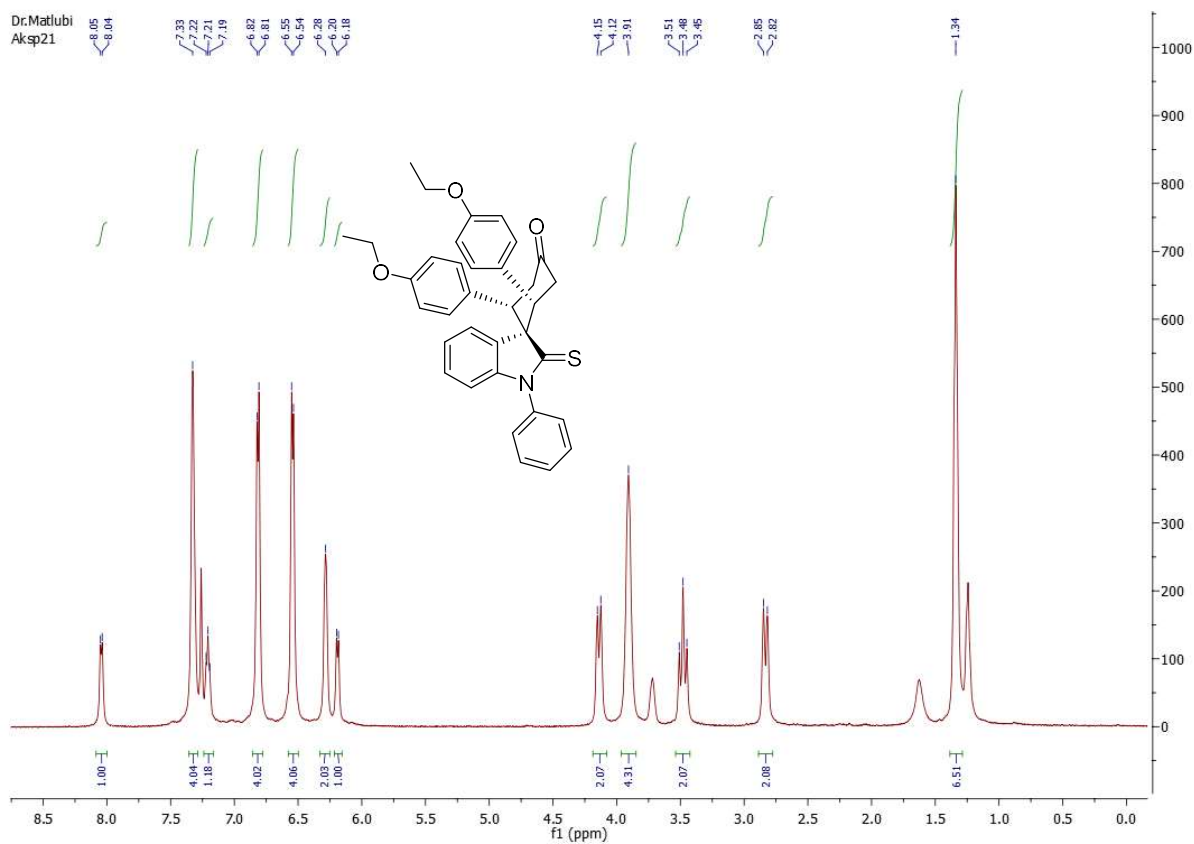

$^1\text{H}$  NMR spectrum ( $\text{CDCl}_3$ , 500 MHz)

Dr. Magdy  
AK Sp. E

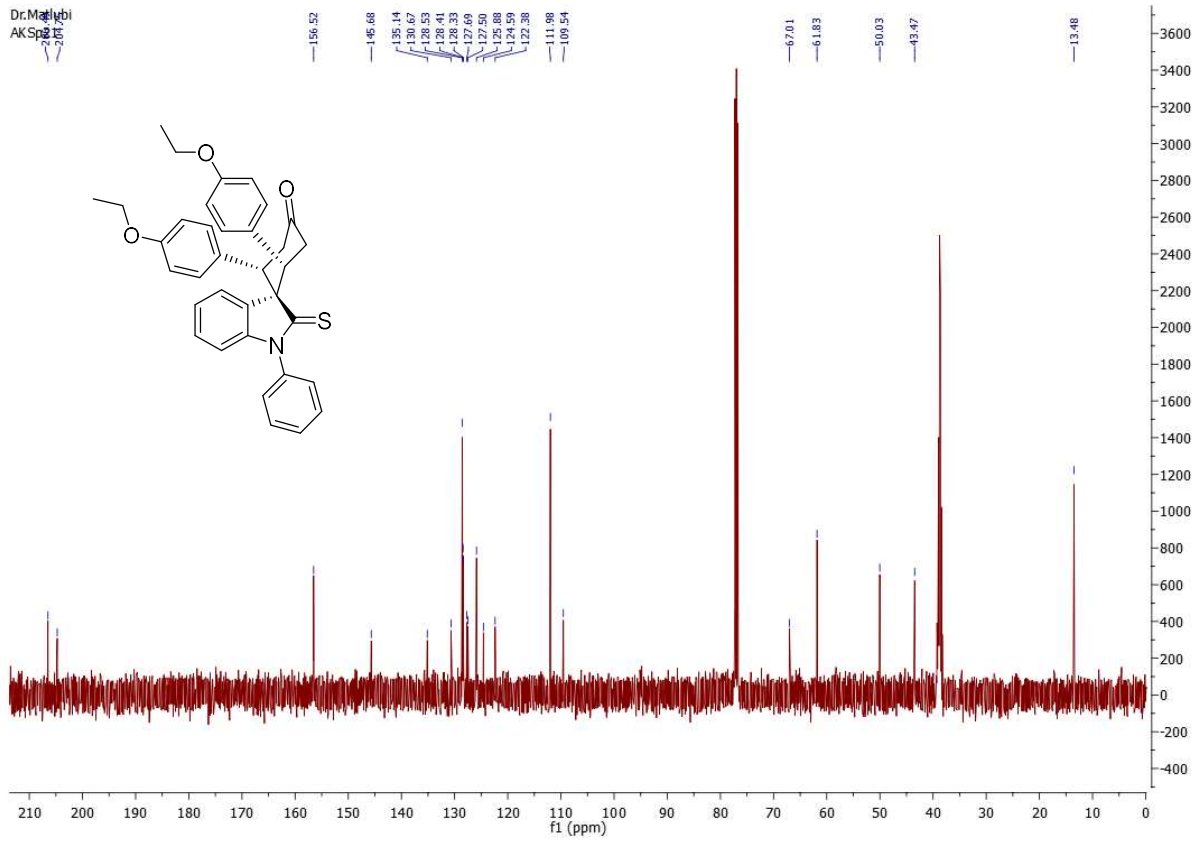

$^{13}\text{C}$  NMR spectrum ( $\text{CDCl}_3$ , 125.8 MHz)

## Crystallography data:

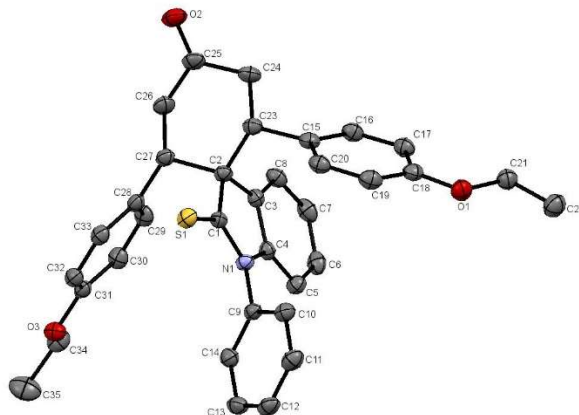

|                      |                                                    |
|----------------------|----------------------------------------------------|
| Empirical Formula    | C <sub>35</sub> H <sub>33</sub> N O <sub>3</sub> S |
| Formula Weight       | 547.68                                             |
| Crystal Color, Habit | pale yellow plate                                  |
| Crystal Dimensions   | 0.240x0.160x0.080 mm                               |
| Crystal System       | monoclinic                                         |
| Lattice Type         | P 2 <sub>1</sub> /c                                |

a(Å) 16.7611(5)

b(Å) 10.7285(4)

c(Å) 16.8814(4)

α(°) 90

β(°) 113.469(1)

γ(°) 90

V(Å<sup>3</sup>) 2784.52(15)

Z 4

d(g-cm<sup>-3</sup>) 1.306



|                       |       |
|-----------------------|-------|
| F(000)                | 1160  |
| $\mu(\text{cm}^{-1})$ | 0.154 |

Intensity measurements:

|                            |                                                            |
|----------------------------|------------------------------------------------------------|
| Diffractometer             | Bruker APEX II CCD                                         |
| Monochromator              | graphite                                                   |
| Radiation                  | MoK $\alpha$ ( $\lambda = 0.71069 \text{ \AA}$ )           |
| Maximum theta              | 27.532 °                                                   |
| HKL ranges                 | -21 21 ; -13 13 ; -21 21                                   |
| No. of Reflexions measured | Total: 19308 Unique: 6331<br>( $R_{\text{int}} = 0.0360$ ) |
| Absorption corrections     | multi-scan; 0.6822 min, 0.7456 max                         |

Structure solution and refinement:

|                                                |                              |
|------------------------------------------------|------------------------------|
| Structure Solution                             | SHELXT-2014                  |
| Refinement                                     | SHELXL-2014/7                |
| Refinement type                                | Fsqd                         |
| Hydrogen atoms                                 | constr                       |
| Parameters refined                             | 363                          |
| Reflections/parameter                          | 14                           |
| wR2                                            | 0.1042                       |
| <b>R1</b>                                      | <b>3.74 %</b>                |
| <b>Completeness</b>                            | <b>98.9 %</b>                |
| Weights a, b                                   | 0.0520; 0.6732               |
| GoF                                            | 1.038                        |
| Difference peak / hole ( $\text{e \AA}^{-3}$ ) | 0.293(0.042) / -0.217(0.042) |

**Table S2.** Atomic Coordinates ( $\text{\AA} \times 10^4$ ) and equivalent isotropic displacement parameters ( $\text{\AA}^2 \times 10^3$ )

| atom  | x       | y        | z       | U(eq) |
|-------|---------|----------|---------|-------|
| S(1)  | 1741(1) | 4434(1)  | 2205(1) | 25(1) |
| O(1)  | 1119(1) | 246(1)   | 5029(1) | 30(1) |
| O(2)  | -102(1) | 8054(1)  | 3359(1) | 36(1) |
| O(3)  | 5237(1) | 8411(1)  | 3617(1) | 27(1) |
| N(1)  | 2955(1) | 4123(1)  | 3805(1) | 20(1) |
| C(1)  | 2218(1) | 4679(1)  | 3254(1) | 20(1) |
| C(2)  | 1906(1) | 5585(1)  | 3778(1) | 21(1) |
| C(3)  | 2589(1) | 5415(1)  | 4686(1) | 21(1) |
| C(4)  | 3198(1) | 4552(1)  | 4664(1) | 20(1) |
| C(5)  | 3911(1) | 4189(1)  | 5388(1) | 26(1) |
| C(6)  | 3987(1) | 4695(1)  | 6176(1) | 29(1) |
| C(7)  | 3381(1) | 5534(1)  | 6220(1) | 30(1) |
| C(8)  | 2681(1) | 5907(1)  | 5478(1) | 26(1) |
| C(9)  | 3402(1) | 3150(1)  | 3567(1) | 21(1) |
| C(10) | 2997(1) | 2003(1)  | 3316(1) | 27(1) |
| C(11) | 3428(1) | 1062(1)  | 3083(1) | 31(1) |
| C(12) | 4252(1) | 1267(1)  | 3107(1) | 31(1) |
| C(13) | 4655(1) | 2410(1)  | 3370(1) | 30(1) |
| C(14) | 4228(1) | 3362(1)  | 3601(1) | 26(1) |
| C(15) | 984(1)  | 3865(1)  | 4061(1) | 23(1) |
| C(16) | 1104(1) | 3681(1)  | 4915(1) | 27(1) |
| C(17) | 1140(1) | 2494(1)  | 5264(1) | 27(1) |
| C(18) | 1064(1) | 1452(1)  | 4750(1) | 25(1) |
| C(19) | 922(1)  | 1613(1)  | 3886(1) | 29(1) |
| C(20) | 882(1)  | 2802(1)  | 3551(1) | 26(1) |
| C(21) | 1197(1) | 39(1)    | 5897(1) | 30(1) |
| C(22) | 1295(1) | -1343(1) | 6061(1) | 37(1) |

|       |         |         |         |       |
|-------|---------|---------|---------|-------|
| C(23) | 977(1)  | 5157(1) | 3680(1) | 23(1) |
| C(24) | 531(1)  | 6139(1) | 4027(1) | 28(1) |
| C(25) | 551(1)  | 7423(1) | 3678(1) | 29(1) |
| C(26) | 1432(1) | 7873(1) | 3758(1) | 30(1) |
| C(27) | 1882(1) | 6919(1) | 3391(1) | 23(1) |
| C(28) | 2777(1) | 7348(1) | 3473(1) | 23(1) |
| C(29) | 3397(1) | 7821(1) | 4239(1) | 27(1) |
| C(30) | 4220(1) | 8181(1) | 4317(1) | 27(1) |
| C(31) | 4445(1) | 8075(1) | 3612(1) | 23(1) |
| C(32) | 3839(1) | 7603(1) | 2837(1) | 25(1) |
| C(33) | 3022(1) | 7250(1) | 2774(1) | 24(1) |
| C(34) | 5835(1) | 9037(1) | 4373(1) | 31(1) |
| C(35) | 6646(1) | 9318(2) | 4231(1) | 48(1) |

---

U(eq) is defined as 1/3 the trace of the Uij tensor.

**Table S3.** Bond lengths (Å) and angles (deg)

---

|              |          |              |          |
|--------------|----------|--------------|----------|
| S(1)-C(1)    | 1.648(1) | O(1)-C(18)   | 1.367(2) |
| O(1)-C(21)   | 1.437(2) | O(2)-C(25)   | 1.214(2) |
| O(3)-C(31)   | 1.372(2) | O(3)-C(34)   | 1.437(2) |
| N(1)-C(1)    | 1.353(2) | N(1)-C(4)    | 1.418(2) |
| N(1)-C(9)    | 1.433(2) | C(1)-C(2)    | 1.540(2) |
| C(2)-C(3)    | 1.515(2) | C(2)-C(27)   | 1.567(2) |
| C(2)-C(23)   | 1.568(2) | C(3)-C(8)    | 1.387(2) |
| C(3)-C(4)    | 1.390(2) | C(4)-C(5)    | 1.382(2) |
| C(5)-C(6)    | 1.394(2) | C(5)-H(5)    | 0.9500   |
| C(6)-C(7)    | 1.382(2) | C(6)-H(6)    | 0.9500   |
| C(7)-C(8)    | 1.391(2) | C(7)-H(7)    | 0.9500   |
| C(8)-H(8)    | 0.9500   | C(9)-C(14)   | 1.382(2) |
| C(9)-C(10)   | 1.388(2) | C(10)-C(11)  | 1.386(2) |
| C(10)-H(10)  | 0.9500   | C(11)-C(12)  | 1.382(2) |
| C(11)-H(11)  | 0.9500   | C(12)-C(13)  | 1.385(2) |
| C(12)-H(12)  | 0.9500   | C(13)-C(14)  | 1.390(2) |
| C(13)-H(13)  | 0.9500   | C(14)-H(14)  | 0.9500   |
| C(15)-C(16)  | 1.389(2) | C(15)-C(20)  | 1.398(2) |
| C(15)-C(23)  | 1.525(2) | C(16)-C(17)  | 1.394(2) |
| C(16)-H(16)  | 0.9500   | C(17)-C(18)  | 1.390(2) |
| C(17)-H(17)  | 0.9500   | C(18)-C(19)  | 1.392(2) |
| C(19)-C(20)  | 1.386(2) | C(19)-H(19)  | 0.9500   |
| C(20)-H(20)  | 0.9500   | C(21)-C(22)  | 1.505(2) |
| C(21)-H(21A) | 0.9900   | C(21)-H(21B) | 0.9900   |
| C(22)-H(22A) | 0.9800   | C(22)-H(22B) | 0.9800   |
| C(22)-H(22C) | 0.9800   | C(23)-C(24)  | 1.537(2) |
| C(23)-H(23)  | 1.0000   | C(24)-C(25)  | 1.503(2) |
| C(24)-H(24A) | 0.9900   | C(24)-H(24B) | 0.9900   |
| C(25)-C(26)  | 1.508(2) | C(26)-C(27)  | 1.540(2) |

|              |          |              |          |
|--------------|----------|--------------|----------|
| C(26)-H(26A) | 0.9900   | C(26)-H(26B) | 0.9900   |
| C(27)-C(28)  | 1.522(2) | C(27)-H(27)  | 1.0000   |
| C(28)-C(29)  | 1.393(2) | C(28)-C(33)  | 1.399(2) |
| C(29)-C(30)  | 1.388(2) | C(29)-H(29)  | 0.9500   |
| C(30)-C(31)  | 1.390(2) | C(30)-H(30)  | 0.9500   |
| C(31)-C(32)  | 1.393(2) | C(32)-C(33)  | 1.383(2) |
| C(32)-H(32)  | 0.9500   | C(33)-H(33)  | 0.9500   |
| C(34)-C(35)  | 1.501(2) | C(34)-H(34A) | 0.9900   |
| C(34)-H(34B) | 0.9900   | C(35)-H(35A) | 0.9800   |
| C(35)-H(35B) | 0.9800   | C(35)-H(35C) | 0.9800   |

|                   |          |                   |          |
|-------------------|----------|-------------------|----------|
| C(18)-O(1)-C(21)  | 117.6(1) | C(31)-O(3)-C(34)  | 117.3(1) |
| C(1)-N(1)-C(4)    | 111.9(1) | C(1)-N(1)-C(9)    | 124.3(1) |
| C(4)-N(1)-C(9)    | 123.6(1) | N(1)-C(1)-C(2)    | 108.0(1) |
| N(1)-C(1)-S(1)    | 126.0(1) | C(2)-C(1)-S(1)    | 126.0(1) |
| C(3)-C(2)-C(1)    | 102.3(1) | C(3)-C(2)-C(27)   | 114.5(1) |
| C(1)-C(2)-C(27)   | 107.2(1) | C(3)-C(2)-C(23)   | 112.9(1) |
| C(1)-C(2)-C(23)   | 107.8(1) | C(27)-C(2)-C(23)  | 111.4(1) |
| C(8)-C(3)-C(4)    | 118.6(1) | C(8)-C(3)-C(2)    | 132.8(1) |
| C(4)-C(3)-C(2)    | 108.6(1) | C(5)-C(4)-C(3)    | 123.3(1) |
| C(5)-C(4)-N(1)    | 127.4(1) | C(3)-C(4)-N(1)    | 109.2(1) |
| C(4)-C(5)-C(6)    | 116.9(1) | C(4)-C(5)-H(5)    | 121.5    |
| C(6)-C(5)-H(5)    | 121.5    | C(7)-C(6)-C(5)    | 121.0(1) |
| C(7)-C(6)-H(6)    | 119.5    | C(5)-C(6)-H(6)    | 119.5    |
| C(6)-C(7)-C(8)    | 120.8(1) | C(6)-C(7)-H(7)    | 119.6    |
| C(8)-C(7)-H(7)    | 119.6    | C(3)-C(8)-C(7)    | 119.3(1) |
| C(3)-C(8)-H(8)    | 120.3    | C(7)-C(8)-H(8)    | 120.3    |
| C(14)-C(9)-C(10)  | 121.3(1) | C(14)-C(9)-N(1)   | 119.7(1) |
| C(10)-C(9)-N(1)   | 119.0(1) | C(11)-C(10)-C(9)  | 119.1(1) |
| C(11)-C(10)-H(10) | 120.5    | C(9)-C(10)-H(10)  | 120.5    |
| C(12)-C(11)-C(10) | 120.2(1) | C(12)-C(11)-H(11) | 119.9    |

|                     |          |                     |          |
|---------------------|----------|---------------------|----------|
| C(10)-C(11)-H(11)   | 119.9    | C(11)-C(12)-C(13)   | 120.3(1) |
| C(11)-C(12)-H(12)   | 119.8    | C(13)-C(12)-H(12)   | 119.8    |
| C(12)-C(13)-C(14)   | 120.0(1) | C(12)-C(13)-H(13)   | 120.0    |
| C(14)-C(13)-H(13)   | 120.0    | C(9)-C(14)-C(13)    | 119.1(1) |
| C(9)-C(14)-H(14)    | 120.4    | C(13)-C(14)-H(14)   | 120.4    |
| C(16)-C(15)-C(20)   | 117.0(1) | C(16)-C(15)-C(23)   | 122.7(1) |
| C(20)-C(15)-C(23)   | 120.2(1) | C(15)-C(16)-C(17)   | 122.2(1) |
| C(15)-C(16)-H(16)   | 118.9    | C(17)-C(16)-H(16)   | 118.9    |
| C(18)-C(17)-C(16)   | 119.5(1) | C(18)-C(17)-H(17)   | 120.2    |
| C(16)-C(17)-H(17)   | 120.2    | O(1)-C(18)-C(17)    | 124.8(1) |
| O(1)-C(18)-C(19)    | 116.0(1) | C(17)-C(18)-C(19)   | 119.3(1) |
| C(20)-C(19)-C(18)   | 120.2(1) | C(20)-C(19)-H(19)   | 119.9    |
| C(18)-C(19)-H(19)   | 119.9    | C(19)-C(20)-C(15)   | 121.7(1) |
| C(19)-C(20)-H(20)   | 119.1    | C(15)-C(20)-H(20)   | 119.1    |
| O(1)-C(21)-C(22)    | 107.3(1) | O(1)-C(21)-H(21A)   | 110.3    |
| C(22)-C(21)-H(21A)  | 110.3    | O(1)-C(21)-H(21B)   | 110.3    |
| C(22)-C(21)-H(21B)  | 110.3    | H(21A)-C(21)-H(21B) | 108.5    |
| C(21)-C(22)-H(22A)  | 109.5    | C(21)-C(22)-H(22B)  | 109.5    |
| H(22A)-C(22)-H(22B) | 109.5    | C(21)-C(22)-H(22C)  | 109.5    |
| H(22A)-C(22)-H(22C) | 109.5    | H(22B)-C(22)-H(22C) | 109.5    |
| C(15)-C(23)-C(24)   | 112.7(1) | C(15)-C(23)-C(2)    | 112.4(1) |
| C(24)-C(23)-C(2)    | 111.9(1) | C(15)-C(23)-H(23)   | 106.4    |
| C(24)-C(23)-H(23)   | 106.4    | C(2)-C(23)-H(23)    | 106.4    |
| C(25)-C(24)-C(23)   | 112.9(1) | C(25)-C(24)-H(24A)  | 109.0    |
| C(23)-C(24)-H(24A)  | 109.0    | C(25)-C(24)-H(24B)  | 109.0    |
| C(23)-C(24)-H(24B)  | 109.0    | H(24A)-C(24)-H(24B) | 107.8    |
| O(2)-C(25)-C(24)    | 121.9(1) | O(2)-C(25)-C(26)    | 122.5(1) |
| C(24)-C(25)-C(26)   | 115.6(1) | C(25)-C(26)-C(27)   | 111.8(1) |
| C(25)-C(26)-H(26A)  | 109.3    | C(27)-C(26)-H(26A)  | 109.3    |
| C(25)-C(26)-H(26B)  | 109.3    | C(27)-C(26)-H(26B)  | 109.3    |
| H(26A)-C(26)-H(26B) | 107.9    | C(28)-C(27)-C(26)   | 112.7(1) |
| C(28)-C(27)-C(2)    | 112.2(1) | C(26)-C(27)-C(2)    | 112.0(1) |

|                     |          |                     |          |
|---------------------|----------|---------------------|----------|
| C(28)-C(27)-H(27)   | 106.5    | C(26)-C(27)-H(27)   | 106.5    |
| C(2)-C(27)-H(27)    | 106.5    | C(29)-C(28)-C(33)   | 116.8(1) |
| C(29)-C(28)-C(27)   | 122.5(1) | C(33)-C(28)-C(27)   | 120.7(1) |
| C(30)-C(29)-C(28)   | 122.3(1) | C(30)-C(29)-H(29)   | 118.8    |
| C(28)-C(29)-H(29)   | 118.8    | C(29)-C(30)-C(31)   | 119.7(1) |
| C(29)-C(30)-H(30)   | 120.1    | C(31)-C(30)-H(30)   | 120.1    |
| O(3)-C(31)-C(30)    | 124.4(1) | O(3)-C(31)-C(32)    | 116.3(1) |
| C(30)-C(31)-C(32)   | 119.2(1) | C(33)-C(32)-C(31)   | 120.1(1) |
| C(33)-C(32)-H(32)   | 119.9    | C(31)-C(32)-H(32)   | 119.9    |
| C(32)-C(33)-C(28)   | 121.8(1) | C(32)-C(33)-H(33)   | 119.1    |
| C(28)-C(33)-H(33)   | 119.1    | O(3)-C(34)-C(35)    | 107.9(1) |
| O(3)-C(34)-H(34A)   | 110.1    | C(35)-C(34)-H(34A)  | 110.1    |
| O(3)-C(34)-H(34B)   | 110.1    | C(35)-C(34)-H(34B)  | 110.1    |
| H(34A)-C(34)-H(34B) | 108.4    | C(34)-C(35)-H(35A)  | 109.5    |
| C(34)-C(35)-H(35B)  | 109.5    | H(35A)-C(35)-H(35B) | 109.5    |
| C(34)-C(35)-H(35C)  | 109.5    | H(35A)-C(35)-H(35C) | 109.5    |
| H(35B)-C(35)-H(35C) | 109.5    |                     |          |

**Table S4.** Anisotropic displacement parameters ( $\text{Å}^2 \times 10^3$ )

| atom  | U11   | U22   | U33   | U23   | U13   | U12   |
|-------|-------|-------|-------|-------|-------|-------|
| S(1)  | 30(1) | 28(1) | 17(1) | -1(1) | 8(1)  | 6(1)  |
| O(1)  | 36(1) | 25(1) | 32(1) | -2(1) | 16(1) | 1(1)  |
| O(2)  | 35(1) | 42(1) | 34(1) | 2(1)  | 16(1) | 17(1) |
| O(3)  | 24(1) | 31(1) | 24(1) | -3(1) | 8(1)  | 1(1)  |
| N(1)  | 22(1) | 22(1) | 18(1) | 0(1)  | 8(1)  | 4(1)  |
| C(1)  | 22(1) | 20(1) | 21(1) | 1(1)  | 10(1) | 2(1)  |
| C(2)  | 22(1) | 22(1) | 19(1) | -1(1) | 10(1) | 4(1)  |
| C(3)  | 22(1) | 21(1) | 20(1) | 0(1)  | 10(1) | -1(1) |
| C(4)  | 24(1) | 20(1) | 19(1) | 0(1)  | 10(1) | -1(1) |
| C(5)  | 25(1) | 26(1) | 24(1) | 2(1)  | 8(1)  | 2(1)  |
| C(6)  | 29(1) | 35(1) | 19(1) | 3(1)  | 6(1)  | -4(1) |
| C(7)  | 33(1) | 39(1) | 19(1) | -5(1) | 13(1) | -8(1) |
| C(8)  | 29(1) | 30(1) | 24(1) | -5(1) | 14(1) | -2(1) |
| C(9)  | 25(1) | 23(1) | 17(1) | 1(1)  | 9(1)  | 7(1)  |
| C(10) | 26(1) | 26(1) | 28(1) | -1(1) | 11(1) | 4(1)  |
| C(11) | 35(1) | 25(1) | 30(1) | -3(1) | 11(1) | 5(1)  |
| C(12) | 36(1) | 33(1) | 24(1) | 1(1)  | 13(1) | 15(1) |
| C(13) | 27(1) | 40(1) | 26(1) | 3(1)  | 14(1) | 9(1)  |
| C(14) | 27(1) | 28(1) | 23(1) | 1(1)  | 12(1) | 2(1)  |
| C(15) | 18(1) | 26(1) | 26(1) | -3(1) | 10(1) | 1(1)  |
| C(16) | 28(1) | 27(1) | 27(1) | -6(1) | 14(1) | -1(1) |
| C(17) | 28(1) | 30(1) | 25(1) | -3(1) | 12(1) | 0(1)  |
| C(18) | 20(1) | 26(1) | 31(1) | -2(1) | 12(1) | -1(1) |
| C(19) | 28(1) | 28(1) | 30(1) | -8(1) | 13(1) | -2(1) |
| C(20) | 23(1) | 32(1) | 24(1) | -5(1) | 10(1) | -1(1) |
| C(21) | 33(1) | 28(1) | 31(1) | 0(1)  | 15(1) | 2(1)  |
| C(22) | 41(1) | 28(1) | 40(1) | 2(1)  | 16(1) | 4(1)  |



|       |       |       |       |        |       |       |
|-------|-------|-------|-------|--------|-------|-------|
| C(23) | 22(1) | 26(1) | 22(1) | -2(1)  | 10(1) | 3(1)  |
| C(24) | 24(1) | 31(1) | 33(1) | -3(1)  | 15(1) | 5(1)  |
| C(25) | 32(1) | 32(1) | 25(1) | -4(1)  | 15(1) | 10(1) |
| C(26) | 35(1) | 24(1) | 34(1) | 0(1)   | 18(1) | 7(1)  |
| C(27) | 26(1) | 21(1) | 24(1) | 0(1)   | 11(1) | 5(1)  |
| C(28) | 28(1) | 18(1) | 24(1) | 2(1)   | 11(1) | 5(1)  |
| C(29) | 37(1) | 26(1) | 21(1) | -2(1)  | 15(1) | 1(1)  |
| C(30) | 33(1) | 26(1) | 20(1) | -3(1)  | 9(1)  | 0(1)  |
| C(31) | 26(1) | 20(1) | 23(1) | 3(1)   | 10(1) | 5(1)  |
| C(32) | 29(1) | 27(1) | 19(1) | 0(1)   | 11(1) | 4(1)  |
| C(33) | 27(1) | 24(1) | 20(1) | 0(1)   | 8(1)  | 3(1)  |
| C(34) | 31(1) | 31(1) | 25(1) | -3(1)  | 5(1)  | 1(1)  |
| C(35) | 32(1) | 62(1) | 47(1) | -15(1) | 12(1) | -9(1) |

---

The anisotropic displacement factor exponent takes the form  $2 \pi^2 [h^2 a^{*2} U(11) + \dots + 2 h k a^* b^* U(12)]$

**Table S5.** Hydrogen Coordinates ( $\text{Å} \times 10^4$ ) and equivalent isotropic displacement parameters ( $\text{Å}^2 \times 10^3$ )

| atom   | x    | y     | z    | U(eq) |
|--------|------|-------|------|-------|
| H(5)   | 4330 | 3622  | 5350 | 31    |
| H(6)   | 4463 | 4459  | 6690 | 35    |
| H(7)   | 3441 | 5860  | 6765 | 36    |
| H(8)   | 2271 | 6492  | 5513 | 32    |
| H(10)  | 2432 | 1865  | 3303 | 32    |
| H(11)  | 3157 | 274   | 2907 | 37    |
| H(12)  | 4542 | 621   | 2942 | 37    |
| H(13)  | 5224 | 2543  | 3391 | 36    |
| H(14)  | 4501 | 4149  | 3780 | 31    |
| H(16)  | 1163 | 4387  | 5274 | 32    |
| H(17)  | 1216 | 2398  | 5849 | 32    |
| H(19)  | 853  | 907   | 3525 | 34    |
| H(20)  | 782  | 2897  | 2958 | 32    |
| H(21A) | 673  | 348   | 5968 | 36    |
| H(21B) | 1711 | 485   | 6312 | 36    |
| H(22A) | 806  | -1779 | 5618 | 55    |
| H(22B) | 1300 | -1524 | 6632 | 55    |
| H(22C) | 1842 | -1626 | 6039 | 55    |
| H(23)  | 619  | 5086  | 3046 | 28    |
| H(24A) | -82  | 5891  | 3872 | 34    |
| H(24B) | 823  | 6161  | 4665 | 34    |
| H(26A) | 1802 | 8027  | 4373 | 36    |
| H(26B) | 1364 | 8671  | 3443 | 36    |
| H(27)  | 1515 | 6854  | 2759 | 28    |
| H(29)  | 3250 | 7901  | 4726 | 32    |
| H(30)  | 4628 | 8497  | 4850 | 32    |
| H(32)  | 3987 | 7524  | 2352 | 29    |

|        |      |      |      |    |
|--------|------|------|------|----|
| H(33)  | 2615 | 6931 | 2241 | 29 |
| H(34A) | 5975 | 8499 | 4887 | 37 |
| H(34B) | 5574 | 9820 | 4469 | 37 |
| H(35A) | 6891 | 8540 | 4121 | 72 |
| H(35B) | 7072 | 9723 | 4746 | 72 |
| H(35C) | 6504 | 9874 | 3732 | 72 |

## Cartesian coordinates and energies

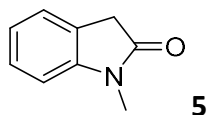

E= -478.0935

H= -478.0926

G= -478.1360

|   |             |             |             |
|---|-------------|-------------|-------------|
| C | -2.73524728 | -0.38277511 | 0.00000000  |
| C | -2.43215428 | 0.99644689  | -0.00004000 |
| C | -3.42847928 | 1.97118089  | -0.00001400 |
| C | -4.76673428 | 1.53679289  | -0.00003800 |
| C | -5.08410628 | 0.17234389  | -0.00006100 |
| C | -4.06169028 | -0.79792711 | -0.00002400 |
| C | -1.43538228 | -1.15398511 | 0.00005700  |
| C | -0.36885828 | -0.05418411 | -0.00006900 |
| H | -3.18955128 | 3.02915889  | 0.00008900  |
| H | -5.56316428 | 2.27449989  | -0.00003700 |
| H | -6.12316528 | -0.14064411 | -0.00012200 |
| H | -4.31179328 | -1.85498611 | -0.00002500 |
| H | -1.30270928 | -1.79227711 | -0.88208900 |
| N | -1.02977328 | 1.17089189  | -0.00012000 |
| C | -0.34289528 | 2.45432389  | 0.00003800  |
| H | -0.60192828 | 3.03462989  | 0.89331400  |
| H | 0.73034772  | 2.25444589  | -0.00035200 |
| H | -0.60256528 | 3.03512589  | -0.89271500 |
| O | 0.86798972  | -0.19998611 | -0.00010500 |
| H | -1.30274128 | -1.79172411 | 0.88265500  |

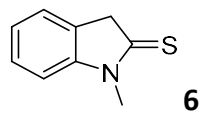

E= -801.0530

H= -801.0521

G= -801.0969

|   |             |             |             |
|---|-------------|-------------|-------------|
| C | -0.82905000 | -0.93437300 | -0.00000800 |
| C | -0.66203400 | 0.46316300  | -0.00000500 |
| C | -1.74312100 | 1.34300900  | -0.00002600 |
| C | -3.03267800 | 0.78187100  | -0.00004700 |
| C | -3.21742000 | -0.60770900 | -0.00005300 |
| C | -2.10920800 | -1.47761900 | -0.00003800 |
| C | 0.54497500  | -1.56450300 | 0.00002200  |
| C | 1.49558800  | -0.37034700 | 0.00009100  |
| H | -1.60654000 | 2.41872900  | -0.00001900 |
| H | -3.89647900 | 1.43913400  | -0.00006100 |
| H | -4.22239900 | -1.01703800 | -0.00007000 |
| H | -2.25731900 | -2.55345200 | -0.00004100 |
| H | 0.73641800  | -2.19085700 | -0.87976700 |
| N | 0.72686500  | 0.76541400  | 0.00001100  |
| C | 1.23993900  | 2.13180100  | -0.00004000 |
| H | 0.89665500  | 2.66466700  | 0.89363600  |
| H | 2.32929400  | 2.08582800  | -0.00031400 |
| H | 0.89619100  | 2.66474800  | -0.89348700 |
| H | 0.73636200  | -2.19091200 | 0.87978300  |
| S | 3.19861400  | -0.45440700 | 0.00005500  |

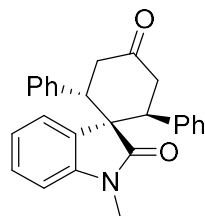

**1 (Gas phase)**

E= -1203.2183

H= -1203.1979

G= -1203.2079

|   |             |             |             |
|---|-------------|-------------|-------------|
| C | 1.48730400  | -0.43130500 | 1.19877400  |
| C | 0.03613700  | -0.19855400 | 0.59797500  |
| C | -0.29404800 | -1.24325900 | -0.51597100 |
| C | -0.11860600 | -2.69854400 | 0.01270200  |
| C | 1.27707700  | -2.91147800 | 0.56509500  |
| C | 1.64752700  | -1.91342400 | 1.65172600  |
| H | -0.82810500 | -2.85480600 | 0.83134700  |
| H | -0.30442100 | -3.41389000 | -0.79156300 |
| H | 0.94594900  | -2.07531100 | 2.47920300  |
| H | 2.67132600  | -2.09878400 | 1.98377200  |
| H | 0.44248600  | -1.07816700 | -1.31199400 |
| C | -0.96512500 | -0.30883200 | 1.77905600  |
| C | -0.18319600 | 1.23512200  | 0.13978000  |
| C | 0.35293800  | 1.94747400  | -0.92178100 |
| C | -1.12058200 | 1.85118700  | 0.98926800  |
| C | -0.04043500 | 3.28141500  | -1.11891600 |
| H | 1.07336200  | 1.48871000  | -1.58540000 |
| C | -1.51523600 | 3.17015200  | 0.81212900  |
| C | -0.95889600 | 3.88339400  | -0.25823700 |
| H | 0.37513200  | 3.84525400  | -1.94515700 |
| H | -2.23774500 | 3.63458700  | 1.47101000  |
| H | -1.25382300 | 4.91375300  | -0.41898500 |
| N | -1.55280500 | 0.93112400  | 1.96052800  |
| C | -2.56400500 | 1.17298900  | 2.99053900  |

|   |             |             |             |
|---|-------------|-------------|-------------|
| H | -2.66795000 | 0.23511000  | 3.54036500  |
| H | -2.24358700 | 1.96974700  | 3.66955700  |
| H | -3.52168400 | 1.44399900  | 2.53374700  |
| O | 2.03299400  | -3.81038600 | 0.17751500  |
| C | -1.68252500 | -1.04581800 | -1.12077000 |
| C | -2.84949900 | -1.36781800 | -0.40937000 |
| C | -1.80899100 | -0.55669800 | -2.42782300 |
| C | -4.10586400 | -1.19398100 | -0.99234500 |
| H | -2.77756400 | -1.75541400 | 0.59919600  |
| C | -3.06483600 | -0.38520000 | -3.01267900 |
| H | -0.91550000 | -0.30760400 | -2.98988000 |
| C | -4.21902300 | -0.70273600 | -2.29499400 |
| H | -4.99712800 | -1.44973900 | -0.43025600 |
| H | -3.14036000 | -0.00628200 | -4.02549300 |
| H | -5.19579800 | -0.57359100 | -2.74670600 |
| H | 1.53796700  | 0.19335400  | 2.09954400  |
| C | 2.61044200  | 0.04255300  | 0.27768900  |
| C | 3.19995600  | -0.77566900 | -0.69906900 |
| C | 3.09123100  | 1.35449400  | 0.42447000  |
| C | 4.21556400  | -0.28121800 | -1.52319800 |
| H | 2.90803300  | -1.81163900 | -0.79524300 |
| C | 4.10878800  | 1.84579600  | -0.39282800 |
| H | 2.65647600  | 1.99535500  | 1.18312300  |
| C | 4.66967200  | 1.03012800  | -1.37856700 |
| H | 4.65992700  | -0.93151700 | -2.26803500 |
| H | 4.46418200  | 2.86109000  | -0.25876600 |
| H | 5.46086400  | 1.40814500  | -2.01564400 |
| O | -1.21762100 | -1.30852000 | 2.47656400  |



**1** (In ethanol)

E= -1195.5054

H= -1195.2395

G= -1195.5004

|   |             |             |             |
|---|-------------|-------------|-------------|
| C | 1.48730400  | -0.43130500 | 1.19877400  |
| C | 0.03613700  | -0.19855400 | 0.59797500  |
| C | -0.29404800 | -1.24325900 | -0.51597100 |
| C | -0.11860600 | -2.69854400 | 0.01270200  |
| C | 1.27707700  | -2.91147800 | 0.56509500  |
| C | 1.64752700  | -1.91342400 | 1.65172600  |
| H | -0.82810500 | -2.85480600 | 0.83134700  |
| H | -0.30442100 | -3.41389000 | -0.79156300 |
| H | 0.94594900  | -2.07531100 | 2.47920300  |
| H | 2.67132600  | -2.09878400 | 1.98377200  |
| H | 0.44248600  | -1.07816700 | -1.31199400 |
| C | -0.96512500 | -0.30883200 | 1.77905600  |
| C | -0.18319600 | 1.23512200  | 0.13978000  |
| C | 0.35293800  | 1.94747400  | -0.92178100 |
| C | -1.12058200 | 1.85118700  | 0.98926800  |
| C | -0.04043500 | 3.28141500  | -1.11891600 |
| H | 1.07336200  | 1.48871000  | -1.58540000 |
| C | -1.51523600 | 3.17015200  | 0.81212900  |
| C | -0.95889600 | 3.88339400  | -0.25823700 |
| H | 0.37513200  | 3.84525400  | -1.94515700 |
| H | -2.23774500 | 3.63458700  | 1.47101000  |
| H | -1.25382300 | 4.91375300  | -0.41898500 |
| N | -1.55280500 | 0.93112400  | 1.96052800  |
| C | -2.56400500 | 1.17298900  | 2.99053900  |

|   |             |             |             |
|---|-------------|-------------|-------------|
| H | -2.66795000 | 0.23511000  | 3.54036500  |
| H | -2.24358700 | 1.96974700  | 3.66955700  |
| H | -3.52168400 | 1.44399900  | 2.53374700  |
| O | 2.03299400  | -3.81038600 | 0.17751500  |
| C | -1.68252500 | -1.04581800 | -1.12077000 |
| C | -2.84949900 | -1.36781800 | -0.40937000 |
| C | -1.80899100 | -0.55669800 | -2.42782300 |
| C | -4.10586400 | -1.19398100 | -0.99234500 |
| H | -2.77756400 | -1.75541400 | 0.59919600  |
| C | -3.06483600 | -0.38520000 | -3.01267900 |
| H | -0.91550000 | -0.30760400 | -2.98988000 |
| C | -4.21902300 | -0.70273600 | -2.29499400 |
| H | -4.99712800 | -1.44973900 | -0.43025600 |
| H | -3.14036000 | -0.00628200 | -4.02549300 |
| H | -5.19579800 | -0.57359100 | -2.74670600 |
| H | 1.53796700  | 0.19335400  | 2.09954400  |
| C | 2.61044200  | 0.04255300  | 0.27768900  |
| C | 3.19995600  | -0.77566900 | -0.69906900 |
| C | 3.09123100  | 1.35449400  | 0.42447000  |
| C | 4.21556400  | -0.28121800 | -1.52319800 |
| H | 2.90803300  | -1.81163900 | -0.79524300 |
| C | 4.10878800  | 1.84579600  | -0.39282800 |
| H | 2.65647600  | 1.99535500  | 1.18312300  |
| C | 4.66967200  | 1.03012800  | -1.37856700 |
| H | 4.65992700  | -0.93151700 | -2.26803500 |
| H | 4.46418200  | 2.86109000  | -0.25876600 |
| H | 5.46086400  | 1.40814500  | -2.01564400 |
| O | -1.21762100 | -1.30852000 | 2.47656400  |



**1** (In toluene)

E= -1195.4977

H= -1195.2475

G= -1195.3465

|   |             |             |             |
|---|-------------|-------------|-------------|
| C | -1.14035091 | -1.02870812 | 0.00000000  |
| C | -2.59151791 | -0.79595712 | -0.60079900 |
| C | -2.92170291 | -1.84066212 | -1.71474500 |
| C | -2.74626091 | -3.29594712 | -1.18607200 |
| C | -1.35057791 | -3.50888112 | -0.63367900 |
| C | -0.98012791 | -2.51082712 | 0.45295200  |
| H | -3.45575991 | -3.45220912 | -0.36742700 |
| H | -2.93207591 | -4.01129312 | -1.99033700 |
| H | -1.68170591 | -2.67271412 | 1.28042900  |
| H | 0.04367109  | -2.69618712 | 0.78499800  |
| H | -2.18516891 | -1.67557012 | -2.51076800 |
| C | -3.59277991 | -0.90623512 | 0.58028200  |
| C | -2.81085091 | 0.63771888  | -1.05899400 |
| C | -2.27471691 | 1.35007088  | -2.12055500 |
| C | -3.74823691 | 1.25378388  | -0.20950600 |
| C | -2.66808991 | 2.68401188  | -2.31769000 |
| H | -1.55429291 | 0.89130688  | -2.78417400 |
| C | -4.14289091 | 2.57274888  | -0.38664500 |
| C | -3.58655091 | 3.28599088  | -1.45701100 |
| H | -2.25252291 | 3.24785088  | -3.14393100 |
| H | -4.86539991 | 3.03718388  | 0.27223600  |
| H | -3.88147791 | 4.31634988  | -1.61775900 |
| N | -4.18045991 | 0.33372088  | 0.76175400  |
| C | -5.19165991 | 0.57558588  | 1.79176500  |

|   |             |             |             |
|---|-------------|-------------|-------------|
| H | -5.29560491 | -0.36229312 | 2.34159100  |
| H | -4.87124191 | 1.37234388  | 2.47078300  |
| H | -6.14933891 | 0.84659588  | 1.33497300  |
| O | -0.59466091 | -4.40778912 | -1.02125900 |
| C | -4.31017991 | -1.64322112 | -2.31954400 |
| C | -5.47715391 | -1.96522112 | -1.60814400 |
| C | -4.43664591 | -1.15410112 | -3.62659700 |
| C | -6.73351891 | -1.79138412 | -2.19111900 |
| H | -5.40521891 | -2.35281712 | -0.59957800 |
| C | -5.69249091 | -0.98260312 | -4.21145300 |
| H | -3.54315491 | -0.90500712 | -4.18865400 |
| C | -6.84667791 | -1.30013912 | -3.49376800 |
| H | -7.62478291 | -2.04714212 | -1.62903000 |
| H | -5.76801491 | -0.60368512 | -5.22426700 |
| H | -7.82345291 | -1.17099412 | -3.94548000 |
| H | -1.08968791 | -0.40404912 | 0.90077000  |
| C | -0.01721291 | -0.55485012 | -0.92108500 |
| C | 0.57230109  | -1.37307212 | -1.89784300 |
| C | 0.46357609  | 0.75709088  | -0.77430400 |
| C | 1.58790909  | -0.87862112 | -2.72197200 |
| H | 0.28037809  | -2.40904212 | -1.99401700 |
| C | 1.48113309  | 1.24839288  | -1.59160200 |
| H | 0.02882109  | 1.39795188  | -0.01565100 |
| C | 2.04201709  | 0.43272488  | -2.57734100 |
| H | 2.03227209  | -1.52892012 | -3.46680900 |
| H | 1.83652709  | 2.26368688  | -1.45754000 |
| H | 2.83320909  | 0.81074188  | -3.21441800 |
| O | -3.84527591 | -1.90592312 | 1.27779000  |

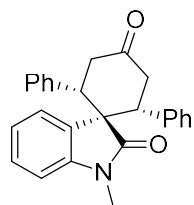

**2 (Gas phase)**

E= -1203.2089

H= -1203.1794

G= -1203.1945

|   |             |             |             |
|---|-------------|-------------|-------------|
| C | -0.79744819 | 0.14354067  | 0.00000000  |
| C | 0.49025781  | -0.63944933 | 0.43822900  |
| C | 1.77796081  | 0.14354367  | -0.00000600 |
| C | 1.75176381  | 1.61107967  | 0.52007600  |
| C | 0.49025281  | 2.32361767  | 0.06242400  |
| C | -0.77125519 | 1.61107667  | 0.52008000  |
| H | -0.76504619 | 0.17604467  | -1.09730300 |
| H | 1.74667981  | 1.58857267  | 1.61499900  |
| H | 2.63048081  | 2.14920867  | 0.15722500  |
| H | -0.76616719 | 1.58857067  | 1.61500400  |
| H | -1.64997419 | 2.14920267  | 0.15723200  |
| H | 1.74555481  | 0.17604767  | -1.09730800 |
| C | 0.49026481  | -0.87427133 | 1.96265600  |
| C | 0.49025881  | -2.05709433 | -0.10372700 |
| C | 0.49025381  | -2.53124433 | -1.40385200 |
| C | 0.49026681  | -2.95822033 | 0.97483000  |
| C | 0.49025681  | -3.91861833 | -1.62521700 |
| H | 0.49024781  | -1.84606933 | -2.24473300 |
| C | 0.49026981  | -4.33147333 | 0.77440300  |
| C | 0.49026481  | -4.80323133 | -0.54584300 |
| H | 0.49025281  | -4.30209133 | -2.63828200 |
| H | 0.49027681  | -5.02243733 | 1.60766800  |
| H | 0.49026781  | -5.87178833 | -0.72587400 |
| N | 0.49027081  | -2.24014833 | 2.18416400  |

|   |             |             |             |
|---|-------------|-------------|-------------|
| C | 0.49028181  | -2.81615733 | 3.52896700  |
| H | 0.49026981  | -1.97200933 | 4.22190500  |
| H | -0.40492219 | -3.42647333 | 3.68620500  |
| H | 1.38550781  | -3.42644433 | 3.68620300  |
| O | 0.49025081  | 3.36861467  | -0.59332100 |
| C | -2.08941419 | -0.56531733 | 0.40078800  |
| C | -2.54607219 | -0.57399733 | 1.72873300  |
| C | -2.86173119 | -1.20639033 | -0.57709700 |
| C | -3.74190019 | -1.21228933 | 2.06246300  |
| H | -1.96522119 | -0.08865233 | 2.50302500  |
| C | -4.05883319 | -1.84279033 | -0.24458300 |
| H | -2.51986819 | -1.20803133 | -1.60620500 |
| C | -4.50332819 | -1.84714633 | 1.07848300  |
| H | -4.08184919 | -1.20793333 | 3.09205400  |
| H | -4.64196219 | -2.33140033 | -1.01673800 |
| H | -5.43414319 | -2.33696633 | 1.34016200  |
| C | 3.06992781  | -0.56531033 | 0.40078200  |
| C | 3.52657881  | -0.57400033 | 1.72872900  |
| C | 3.84225281  | -1.20637333 | -0.57710400 |
| C | 4.72240781  | -1.21229033 | 2.06246000  |
| H | 2.94572181  | -0.08866533 | 2.50302300  |
| C | 5.03935481  | -1.84277033 | -0.24459000 |
| H | 3.50039381  | -1.20800633 | -1.60621500 |
| C | 5.48384381  | -1.84713533 | 1.07847800  |
| H | 5.06235181  | -1.20794233 | 3.09205200  |
| H | 5.62249081  | -2.33137133 | -1.01674700 |
| H | 6.41465981  | -2.33695333 | 1.34015700  |
| O | 0.49026981  | -0.01204033 | 2.86215900  |





**2** (In ethanol)

E= -1195.5118

H= -1195.4754

G= -1195.4916

|   |             |             |             |
|---|-------------|-------------|-------------|
| C | -2.02721283 | 0.78009693  | 0.44317295  |
| C | -0.73950683 | -0.00289307 | 0.88140195  |
| C | 0.54819617  | 0.78009993  | 0.44316695  |
| C | 0.52199917  | 2.24763593  | 0.96324895  |
| C | -0.73951183 | 2.96017393  | 0.50559695  |
| C | -2.00101983 | 2.24763293  | 0.96325295  |
| H | -1.99481083 | 0.81260093  | -0.65413005 |
| H | 0.51691517  | 2.22512893  | 2.05817195  |
| H | 1.40071617  | 2.78576493  | 0.60039795  |
| H | -1.99593183 | 2.22512693  | 2.05817695  |
| H | -2.87973883 | 2.78575893  | 0.60040495  |
| H | 0.51579017  | 0.81260393  | -0.65413505 |
| C | -0.73949983 | -0.23771507 | 2.40582895  |
| C | -0.73950483 | -1.42053807 | 0.33944595  |
| C | -0.73951083 | -1.89468807 | -0.96067905 |
| C | -0.73949783 | -2.32166407 | 1.41800295  |
| C | -0.73950783 | -3.28206207 | -1.18204405 |
| H | -0.73951683 | -1.20951307 | -1.80156005 |
| C | -0.73949483 | -3.69491707 | 1.21757595  |
| C | -0.73949983 | -4.16667507 | -0.10267005 |
| H | -0.73951183 | -3.66553507 | -2.19510905 |
| H | -0.73948783 | -4.38588107 | 2.05084095  |
| H | -0.73949683 | -5.23523207 | -0.28270105 |
| N | -0.73949383 | -1.60359207 | 2.62733695  |

|   |             |             |             |
|---|-------------|-------------|-------------|
| C | -0.73948283 | -2.17960107 | 3.97213995  |
| H | -0.73949483 | -1.33545307 | 4.66507795  |
| H | -1.63468683 | -2.78991707 | 4.12937795  |
| H | 0.15574317  | -2.78988807 | 4.12937595  |
| O | -0.73951383 | 4.00517093  | -0.15014805 |
| C | -3.31917883 | 0.07123893  | 0.84396095  |
| C | -3.77583683 | 0.06255893  | 2.17190595  |
| C | -4.09149583 | -0.56983407 | -0.13392405 |
| C | -4.97166483 | -0.57573307 | 2.50563595  |
| H | -3.19498583 | 0.54790393  | 2.94619795  |
| C | -5.28859783 | -1.20623407 | 0.19858995  |
| H | -3.74963283 | -0.57147507 | -1.16303205 |
| C | -5.73309283 | -1.21059007 | 1.52165595  |
| H | -5.31161383 | -0.57137707 | 3.53522695  |
| H | -5.87172683 | -1.69484407 | -0.57356505 |
| H | -6.66390783 | -1.70041007 | 1.78333495  |
| C | 1.84016317  | 0.07124593  | 0.84395495  |
| C | 2.29681417  | 0.06255593  | 2.17190195  |
| C | 2.61248817  | -0.56981707 | -0.13393105 |
| C | 3.49264317  | -0.57573407 | 2.50563295  |
| H | 1.71595717  | 0.54789093  | 2.94619595  |
| C | 3.80959017  | -1.20621407 | 0.19858295  |
| H | 2.27062917  | -0.57145007 | -1.16304205 |
| C | 4.25407917  | -1.21057907 | 1.52165095  |
| H | 3.83258717  | -0.57138607 | 3.53522495  |
| H | 4.39272617  | -1.69481507 | -0.57357405 |
| H | 5.18489517  | -1.70039707 | 1.78332995  |
| O | -0.73949483 | 0.62451593  | 3.30533195  |



**2** (In toluene)

E= -1195.5030

H= -1195.3858

G= -1195.4568

|   |             |             |             |
|---|-------------|-------------|-------------|
| C | -1.99362047 | 0.88516745  | 0.00000000  |
| C | -0.70591447 | 0.10217745  | 0.43822900  |
| C | 0.58178853  | 0.88517045  | -0.00000600 |
| C | 0.55559153  | 2.35270645  | 0.52007600  |
| C | -0.70591947 | 3.06524445  | 0.06242400  |
| C | -1.96742747 | 2.35270345  | 0.52008000  |
| H | -1.96121847 | 0.91767145  | -1.09730300 |
| H | 0.55050753  | 2.33019945  | 1.61499900  |
| H | 1.43430853  | 2.89083545  | 0.15722500  |
| H | -1.96233947 | 2.33019745  | 1.61500400  |
| H | -2.84614647 | 2.89082945  | 0.15723200  |
| H | 0.54938253  | 0.91767445  | -1.09730800 |
| C | -0.70590747 | -0.13264455 | 1.96265600  |
| C | -0.70591247 | -1.31546755 | -0.10372700 |
| C | -0.70591847 | -1.78961755 | -1.40385200 |
| C | -0.70590547 | -2.21659355 | 0.97483000  |
| C | -0.70591547 | -3.17699155 | -1.62521700 |
| H | -0.70592447 | -1.10444255 | -2.24473300 |
| C | -0.70590247 | -3.58984655 | 0.77440300  |
| C | -0.70590747 | -4.06160455 | -0.54584300 |
| H | -0.70591947 | -3.56046455 | -2.63828200 |
| H | -0.70589547 | -4.28081055 | 1.60766800  |
| H | -0.70590447 | -5.13016155 | -0.72587400 |
| N | -0.70590147 | -1.49852155 | 2.18416400  |

|   |             |             |             |
|---|-------------|-------------|-------------|
| C | -0.70589047 | -2.07453055 | 3.52896700  |
| H | -0.70590247 | -1.23038255 | 4.22190500  |
| H | -1.60109447 | -2.68484655 | 3.68620500  |
| H | 0.18933553  | -2.68481755 | 3.68620300  |
| O | -0.70592147 | 4.11024145  | -0.59332100 |
| C | -3.28558647 | 0.17630945  | 0.40078800  |
| C | -3.74224447 | 0.16762945  | 1.72873300  |
| C | -4.05790347 | -0.46476355 | -0.57709700 |
| C | -4.93807247 | -0.47066255 | 2.06246300  |
| H | -3.16139347 | 0.65297445  | 2.50302500  |
| C | -5.25500547 | -1.10116355 | -0.24458300 |
| H | -3.71604047 | -0.46640455 | -1.60620500 |
| C | -5.69950047 | -1.10551955 | 1.07848300  |
| H | -5.27802147 | -0.46630655 | 3.09205400  |
| H | -5.83813447 | -1.58977355 | -1.01673800 |
| H | -6.63031547 | -1.59533955 | 1.34016200  |
| C | 1.87375553  | 0.17631645  | 0.40078200  |
| C | 2.33040653  | 0.16762645  | 1.72872900  |
| C | 2.64608053  | -0.46474655 | -0.57710400 |
| C | 3.52623553  | -0.47066355 | 2.06246000  |
| H | 1.74954953  | 0.65296145  | 2.50302300  |
| C | 3.84318253  | -1.10114355 | -0.24459000 |
| H | 2.30422153  | -0.46637955 | -1.60621500 |
| C | 4.28767153  | -1.10550855 | 1.07847800  |
| H | 3.86617953  | -0.46631555 | 3.09205200  |
| H | 4.42631853  | -1.58974455 | -1.01674700 |
| H | 5.21848753  | -1.59532655 | 1.34015700  |
| O | -0.70590247 | 0.72958645  | 2.86215900  |

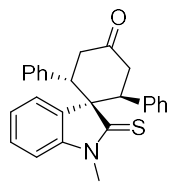

**3** (Gas phase)

E= -1524.6162

H= -1524.5954

G= -1524.6064

|   |             |             |             |
|---|-------------|-------------|-------------|
| C | -1.17224883 | 0.34290271  | 0.00000000  |
| C | -2.59640083 | 0.83908171  | -0.51238500 |
| C | -3.00421683 | 0.12602871  | -1.86045200 |
| C | -2.89249483 | -1.42133229 | -1.77052700 |
| C | -1.48053283 | -1.81178429 | -1.38485100 |
| C | -1.03689583 | -1.21007029 | -0.06348800 |
| H | -3.58177483 | -1.78928429 | -1.00288900 |
| H | -3.13854483 | -1.86238029 | -2.73957900 |
| H | -1.69224683 | -1.62664129 | 0.71166800  |
| H | -0.00114683 | -1.49537829 | 0.13492200  |
| H | -2.25268583 | 0.46539171  | -2.58454000 |
| C | -3.65275883 | 0.64091571  | 0.60827500  |
| C | -2.66827483 | 2.35118371  | -0.73832600 |
| C | -1.99587783 | 3.18362471  | -1.62363800 |
| C | -3.66856083 | 2.88563171  | 0.08134500  |
| C | -2.32434183 | 4.54765771  | -1.65659300 |
| H | -1.22183383 | 2.79575471  | -2.27084900 |
| C | -4.01092683 | 4.23157471  | 0.06431800  |
| C | -3.31722783 | 5.06432371  | -0.82145200 |
| H | -1.79858183 | 5.20558371  | -2.33782300 |
| H | -4.78996083 | 4.62652171  | 0.70300700  |
| H | -3.56007983 | 6.11953671  | -0.85971200 |
| N | -4.22498683 | 1.84786171  | 0.86783500  |
| C | -5.30098183 | 2.08549871  | 1.84096200  |
| H | -5.50997483 | 1.13732271  | 2.33613900  |

|   |             |             |             |
|---|-------------|-------------|-------------|
| H | -4.97756783 | 2.83053471  | 2.57417800  |
| H | -6.19374283 | 2.44285971  | 1.31853600  |
| S | -4.05037483 | -0.80621829 | 1.44393200  |
| O | -0.76254683 | -2.54245229 | -2.07882800 |
| C | -4.36871183 | 0.56018071  | -2.39121900 |
| C | -5.56646883 | 0.09339671  | -1.82807100 |
| C | -4.44019783 | 1.41588271  | -3.49961400 |
| C | -6.79889383 | 0.48295971  | -2.35630100 |
| H | -5.53823583 | -0.57129729 | -0.97414100 |
| C | -5.67141383 | 1.80467171  | -4.02980700 |
| H | -3.52316583 | 1.78246571  | -3.94703000 |
| C | -6.85677083 | 1.33887871  | -3.45835900 |
| H | -7.71403583 | 0.10974671  | -1.91036700 |
| H | -5.70349983 | 2.46604871  | -4.88808200 |
| H | -7.81469183 | 1.63470971  | -3.87044000 |
| H | -1.12583583 | 0.62764571  | 1.05731700  |
| C | -0.00404683 | 1.03951471  | -0.69743900 |
| C | 0.56104317  | 0.56243871  | -1.89075500 |
| C | 0.54340917  | 2.19402471  | -0.11578800 |
| C | 1.61892917  | 1.24500971  | -2.49886400 |
| H | 0.21452317  | -0.36363529 | -2.32850600 |
| C | 1.60499317  | 2.86995171  | -0.71666800 |
| H | 0.12670617  | 2.56819171  | 0.81293300  |
| C | 2.14071417  | 2.40245771  | -1.91934800 |
| H | 2.04374117  | 0.85843071  | -3.41825200 |
| H | 2.01303217  | 3.75794571  | -0.24762400 |
| H | 2.96499217  | 2.92549671  | -2.39020400 |

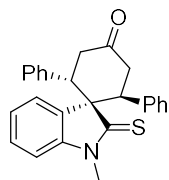

**3** (In ethanol)

E= -1516.6051

H= -1516.5684

G= -1516.5894

|   |             |            |             |
|---|-------------|------------|-------------|
| C | -1.40350881 | 2.63955339 | 0.00000000  |
| C | -2.82766081 | 3.13573239 | -0.51238500 |
| C | -3.23547681 | 2.42267939 | -1.86045200 |
| C | -3.12375481 | 0.87531839 | -1.77052700 |
| C | -1.71179281 | 0.48486639 | -1.38485100 |
| C | -1.26815581 | 1.08658039 | -0.06348800 |
| H | -3.81303481 | 0.50736639 | -1.00288900 |
| H | -3.36980481 | 0.43427039 | -2.73957900 |
| H | -1.92350681 | 0.67000939 | 0.71166800  |
| H | -0.23240681 | 0.80127239 | 0.13492200  |
| H | -2.48394581 | 2.76204239 | -2.58454000 |
| C | -3.88401881 | 2.93756639 | 0.60827500  |
| C | -2.89953481 | 4.64783439 | -0.73832600 |
| C | -2.22713781 | 5.48027539 | -1.62363800 |
| C | -3.89982081 | 5.18228239 | 0.08134500  |
| C | -2.55560181 | 6.84430839 | -1.65659300 |
| H | -1.45309381 | 5.09240539 | -2.27084900 |
| C | -4.24218681 | 6.52822539 | 0.06431800  |
| C | -3.54848781 | 7.36097439 | -0.82145200 |
| H | -2.02984181 | 7.50223439 | -2.33782300 |
| H | -5.02122081 | 6.92317239 | 0.70300700  |
| H | -3.79133981 | 8.41618739 | -0.85971200 |
| N | -4.45624681 | 4.14451239 | 0.86783500  |
| C | -5.53224181 | 4.38214939 | 1.84096200  |
| H | -5.74123481 | 3.43397339 | 2.33613900  |

|   |             |             |             |
|---|-------------|-------------|-------------|
| H | -5.20882781 | 5.12718539  | 2.57417800  |
| H | -6.42500281 | 4.73951039  | 1.31853600  |
| S | -4.28163481 | 1.49043239  | 1.44393200  |
| O | -0.99380681 | -0.24580161 | -2.07882800 |
| C | -4.59997181 | 2.85683139  | -2.39121900 |
| C | -5.79772881 | 2.39004739  | -1.82807100 |
| C | -4.67145781 | 3.71253339  | -3.49961400 |
| C | -7.03015381 | 2.77961039  | -2.35630100 |
| H | -5.76949581 | 1.72535339  | -0.97414100 |
| C | -5.90267381 | 4.10132239  | -4.02980700 |
| H | -3.75442581 | 4.07911639  | -3.94703000 |
| C | -7.08803081 | 3.63552939  | -3.45835900 |
| H | -7.94529581 | 2.40639739  | -1.91036700 |
| H | -5.93475981 | 4.76269939  | -4.88808200 |
| H | -8.04595181 | 3.93136039  | -3.87044000 |
| H | -1.35709581 | 2.92429639  | 1.05731700  |
| C | -0.23530681 | 3.33616539  | -0.69743900 |
| C | 0.32978319  | 2.85908939  | -1.89075500 |
| C | 0.31214919  | 4.49067539  | -0.11578800 |
| C | 1.38766919  | 3.54166039  | -2.49886400 |
| H | -0.01673681 | 1.93301539  | -2.32850600 |
| C | 1.37373319  | 5.16660239  | -0.71666800 |
| H | -0.10455381 | 4.86484239  | 0.81293300  |
| C | 1.90945419  | 4.69910839  | -1.91934800 |
| H | 1.81248119  | 3.15508139  | -3.41825200 |
| H | 1.78177219  | 6.05459639  | -0.24762400 |
| H | 2.73373219  | 5.22214739  | -2.39020400 |



**3** (In toluene)

E= -1516.5969

H= -1516.5634

G= -1516.5846

|   |             |             |             |
|---|-------------|-------------|-------------|
| C | -2.94258381 | 1.24401912  | 0.00000000  |
| C | -4.36673581 | 1.74019812  | -0.51238500 |
| C | -4.77455181 | 1.02714512  | -1.86045200 |
| C | -4.66282981 | -0.52021588 | -1.77052700 |
| C | -3.25086781 | -0.91066788 | -1.38485100 |
| C | -2.80723081 | -0.30895388 | -0.06348800 |
| H | -5.35210981 | -0.88816788 | -1.00288900 |
| H | -4.90887981 | -0.96126388 | -2.73957900 |
| H | -3.46258181 | -0.72552488 | 0.71166800  |
| H | -1.77148181 | -0.59426188 | 0.13492200  |
| H | -4.02302081 | 1.36650812  | -2.58454000 |
| C | -5.42309381 | 1.54203212  | 0.60827500  |
| C | -4.43860981 | 3.25230012  | -0.73832600 |
| C | -3.76621281 | 4.08474112  | -1.62363800 |
| C | -5.43889581 | 3.78674812  | 0.08134500  |
| C | -4.09467681 | 5.44877412  | -1.65659300 |
| H | -2.99216881 | 3.69687112  | -2.27084900 |
| C | -5.78126181 | 5.13269112  | 0.06431800  |
| C | -5.08756281 | 5.96544012  | -0.82145200 |
| H | -3.56891681 | 6.10670012  | -2.33782300 |
| H | -6.56029581 | 5.52763812  | 0.70300700  |
| H | -5.33041481 | 7.02065312  | -0.85971200 |
| N | -5.99532181 | 2.74897812  | 0.86783500  |
| C | -7.07131681 | 2.98661512  | 1.84096200  |
| H | -7.28030981 | 2.03843912  | 2.33613900  |

|   |             |             |             |
|---|-------------|-------------|-------------|
| H | -6.74790281 | 3.73165112  | 2.57417800  |
| H | -7.96407781 | 3.34397612  | 1.31853600  |
| S | -5.82070981 | 0.09489812  | 1.44393200  |
| O | -2.53288181 | -1.64133588 | -2.07882800 |
| C | -6.13904681 | 1.46129712  | -2.39121900 |
| C | -7.33680381 | 0.99451312  | -1.82807100 |
| C | -6.21053281 | 2.31699912  | -3.49961400 |
| C | -8.56922881 | 1.38407612  | -2.35630100 |
| H | -7.30857081 | 0.32981912  | -0.97414100 |
| C | -7.44174881 | 2.70578812  | -4.02980700 |
| H | -5.29350081 | 2.68358212  | -3.94703000 |
| C | -8.62710581 | 2.23999512  | -3.45835900 |
| H | -9.48437081 | 1.01086312  | -1.91036700 |
| H | -7.47383481 | 3.36716512  | -4.88808200 |
| H | -9.58502681 | 2.53582612  | -3.87044000 |
| H | -2.89617081 | 1.52876212  | 1.05731700  |
| C | -1.77438181 | 1.94063112  | -0.69743900 |
| C | -1.20929181 | 1.46355512  | -1.89075500 |
| C | -1.22692581 | 3.09514112  | -0.11578800 |
| C | -0.15140581 | 2.14612612  | -2.49886400 |
| H | -1.55581181 | 0.53748112  | -2.32850600 |
| C | -0.16534181 | 3.77106812  | -0.71666800 |
| H | -1.64362881 | 3.46930812  | 0.81293300  |
| C | 0.37037919  | 3.30357412  | -1.91934800 |
| H | 0.27340619  | 1.75954712  | -3.41825200 |
| H | 0.24269719  | 4.65906212  | -0.24762400 |
| H | 1.19465719  | 3.82661312  | -2.39020400 |

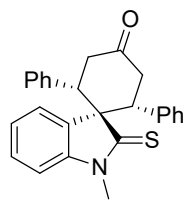

**4**(Gas phase)

E= -1524.6243

H= -1524.6045

G= -1524.6184

|   |             |             |             |
|---|-------------|-------------|-------------|
| C | -1.28317300 | 1.10360200  | -0.83749800 |
| C | -0.00001800 | 0.37978800  | -0.26899000 |
| C | 1.28312000  | 1.10363000  | -0.83751200 |
| C | 1.26996200  | 2.63260200  | -0.56440900 |
| C | -0.00005000 | 3.27672000  | -1.09927600 |
| C | -1.27004500 | 2.63257500  | -0.56439600 |
| H | -1.20132800 | 0.97260200  | -1.92516000 |
| H | 1.30603500  | 2.80231800  | 0.51769100  |
| H | 2.13594700  | 3.09762700  | -1.04228600 |
| H | -1.30611100 | 2.80229200  | 0.51770400  |
| H | -2.13604400 | 3.09758200  | -1.04226700 |
| H | 1.20126700  | 0.97262700  | -1.92517300 |
| C | 0.00000500  | 0.23972500  | 1.26961000  |
| C | 0.00000300  | -1.07713300 | -0.72006500 |
| C | -0.00000900 | -1.64104900 | -1.98598600 |
| C | 0.00005000  | -1.90160400 | 0.40826400  |
| C | 0.00002900  | -3.03981200 | -2.10576000 |
| H | -0.00004600 | -1.01901300 | -2.87403200 |
| C | 0.00009200  | -3.28672200 | 0.31507900  |
| C | 0.00008000  | -3.84967200 | -0.96756600 |
| H | 0.00002000  | -3.49425700 | -3.08905000 |
| H | 0.00013600  | -3.91506000 | 1.19585700  |
| H | 0.00011100  | -4.92777700 | -1.07374100 |
| N | 0.00004800  | -1.08778000 | 1.56849000  |

|   |             |             |             |
|---|-------------|-------------|-------------|
| C | 0.00010000  | -1.65108600 | 2.92652700  |
| H | -0.00006300 | -0.81625000 | 3.62727800  |
| H | -0.89559700 | -2.26312200 | 3.06951200  |
| H | 0.89599800  | -2.26281600 | 3.06957800  |
| S | -0.00000400 | 1.49390700  | 2.44631100  |
| O | -0.00006400 | 4.23927100  | -1.87155500 |
| C | -2.59574400 | 0.44805900  | -0.41275700 |
| C | -3.15599700 | 0.64857600  | 0.85818800  |
| C | -3.28878500 | -0.35798300 | -1.32802500 |
| C | -4.36844700 | 0.04776000  | 1.20277500  |
| H | -2.64089400 | 1.26445400  | 1.58323900  |
| C | -4.50204900 | -0.95676900 | -0.98583500 |
| H | -2.87194900 | -0.51911400 | -2.31595800 |
| C | -5.04617700 | -0.75624100 | 0.28398300  |
| H | -4.78580500 | 0.21463400  | 2.18941900  |
| H | -5.02104400 | -1.57465700 | -1.70968500 |
| H | -5.99006800 | -1.21646700 | 0.55262200  |
| C | 2.59570700  | 0.44811200  | -0.41278000 |
| C | 3.15596900  | 0.64864800  | 0.85815800  |
| C | 3.28875200  | -0.35792600 | -1.32804800 |
| C | 4.36843100  | 0.04785300  | 1.20273900  |
| H | 2.64086500  | 1.26452500  | 1.58320900  |
| C | 4.50202900  | -0.95669100 | -0.98586500 |
| H | 2.87190900  | -0.51907200 | -2.31597500 |
| C | 5.04616500  | -0.75614500 | 0.28394700  |
| H | 4.78579600  | 0.21474100  | 2.18937800  |
| H | 5.02102700  | -1.57457600 | -1.70971500 |
| H | 5.99006500  | -1.21635600 | 0.55258200  |

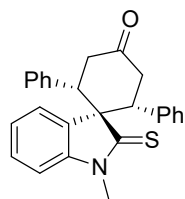

**4** (In ethanol)

E= -1516.6100

H= -1516.5794

G= -1516.6034

|   |             |             |             |
|---|-------------|-------------|-------------|
| C | 0.78947370  | 1.90590109  | 0.00000000  |
| C | 2.07262870  | 1.18208709  | 0.56850800  |
| C | 3.35576670  | 1.90592909  | -0.00001400 |
| C | 3.34260870  | 3.43490109  | 0.27308900  |
| C | 2.07259670  | 4.07901909  | -0.26177800 |
| C | 0.80260170  | 3.43487409  | 0.27310200  |
| H | 0.87131870  | 1.77490109  | -1.08766200 |
| H | 3.37868170  | 3.60461709  | 1.35518900  |
| H | 4.20859370  | 3.89992609  | -0.20478800 |
| H | 0.76653570  | 3.60459109  | 1.35520200  |
| H | -0.06339730 | 3.89988109  | -0.20476900 |
| H | 3.27391370  | 1.77492609  | -1.08767500 |
| C | 2.07265170  | 1.04202409  | 2.10710800  |
| C | 2.07264970  | -0.27483391 | 0.11743300  |
| C | 2.07263770  | -0.83874991 | -1.14848800 |
| C | 2.07269670  | -1.09930491 | 1.24576200  |
| C | 2.07267570  | -2.23751291 | -1.26826200 |
| H | 2.07260070  | -0.21671391 | -2.03653400 |
| C | 2.07273870  | -2.48442291 | 1.15257700  |
| C | 2.07272670  | -3.04737291 | -0.13006800 |
| H | 2.07266670  | -2.69195791 | -2.25155200 |
| H | 2.07278270  | -3.11276091 | 2.03335500  |
| H | 2.07275770  | -4.12547791 | -0.23624300 |
| N | 2.07269470  | -0.28548091 | 2.40598800  |

|   |             |             |             |
|---|-------------|-------------|-------------|
| C | 2.07274670  | -0.84878691 | 3.76402500  |
| H | 2.07258370  | -0.01395091 | 4.46477600  |
| H | 1.17704970  | -1.46082291 | 3.90701000  |
| H | 2.96864470  | -1.46051691 | 3.90707600  |
| S | 2.07264270  | 2.29620609  | 3.28380900  |
| O | 2.07258270  | 5.04157009  | -1.03405700 |
| C | -0.52309730 | 1.25035809  | 0.42474100  |
| C | -1.08335030 | 1.45087509  | 1.69568600  |
| C | -1.21613830 | 0.44431609  | -0.49052700 |
| C | -2.29580030 | 0.85005909  | 2.04027300  |
| H | -0.56824730 | 2.06675309  | 2.42073700  |
| C | -2.42940230 | -0.15446991 | -0.14833700 |
| H | -0.79930230 | 0.28318509  | -1.47846000 |
| C | -2.97353030 | 0.04605809  | 1.12148100  |
| H | -2.71315830 | 1.01693309  | 3.02691700  |
| H | -2.94839730 | -0.77235791 | -0.87218700 |
| H | -3.91742130 | -0.41416791 | 1.39012000  |
| C | 4.66835370  | 1.25041109  | 0.42471800  |
| C | 5.22861570  | 1.45094709  | 1.69565600  |
| C | 5.36139870  | 0.44437309  | -0.49055000 |
| C | 6.44107770  | 0.85015209  | 2.04023700  |
| H | 4.71351170  | 2.06682409  | 2.42070700  |
| C | 6.57467570  | -0.15439191 | -0.14836700 |
| H | 4.94455570  | 0.28322709  | -1.47847700 |
| C | 7.11881170  | 0.04615409  | 1.12144500  |
| H | 6.85844270  | 1.01704009  | 3.02687600  |
| H | 7.09367370  | -0.77227691 | -0.87221700 |
| H | 8.06271170  | -0.41405691 | 1.39008000  |



**4** (In toluene)

E= -1516.6007

H= -1516.5784

G= -1516.5937

|   |             |             |             |
|---|-------------|-------------|-------------|
| C | -4.45362269 | -2.11963501 | 0.09782903  |
| C | -3.17046769 | -2.84344901 | 0.66633703  |
| C | -1.88732969 | -2.11960701 | 0.09781503  |
| C | -1.90048769 | -0.59063501 | 0.37091803  |
| C | -3.17049969 | 0.05348299  | -0.16394897 |
| C | -4.44049469 | -0.59066201 | 0.37093103  |
| H | -4.37177769 | -2.25063501 | -0.98983297 |
| H | -1.86441469 | -0.42091901 | 1.45301803  |
| H | -1.03450269 | -0.12561001 | -0.10695897 |
| H | -4.47656069 | -0.42094501 | 1.45303103  |
| H | -5.30649369 | -0.12565501 | -0.10693997 |
| H | -1.96918269 | -2.25061001 | -0.98984597 |
| C | -3.17044469 | -2.98351201 | 2.20493703  |
| C | -3.17044669 | -4.30037001 | 0.21526203  |
| C | -3.17045869 | -4.86428601 | -1.05065897 |
| C | -3.17039969 | -5.12484101 | 1.34359103  |
| C | -3.17042069 | -6.26304901 | -1.17043297 |
| H | -3.17049569 | -4.24225001 | -1.93870497 |
| C | -3.17035769 | -6.50995901 | 1.25040603  |
| C | -3.17036969 | -7.07290901 | -0.03223897 |
| H | -3.17042969 | -6.71749401 | -2.15372297 |
| H | -3.17031369 | -7.13829701 | 2.13118403  |
| H | -3.17033869 | -8.15101401 | -0.13841397 |
| N | -3.17040169 | -4.31101701 | 2.50381703  |

|   |             |             |             |
|---|-------------|-------------|-------------|
| C | -3.17034969 | -4.87432301 | 3.86185403  |
| H | -3.17051269 | -4.03948701 | 4.56260503  |
| H | -4.06604669 | -5.48635901 | 4.00483903  |
| H | -2.27445169 | -5.48605301 | 4.00490503  |
| S | -3.17045369 | -1.72933001 | 3.38163803  |
| O | -3.17051369 | 1.01603399  | -0.93622797 |
| C | -5.76619369 | -2.77517801 | 0.52257003  |
| C | -6.32644669 | -2.57466101 | 1.79351503  |
| C | -6.45923469 | -3.58122001 | -0.39269797 |
| C | -7.53889669 | -3.17547701 | 2.13810203  |
| H | -5.81134369 | -1.95878301 | 2.51856603  |
| C | -7.67249869 | -4.18000601 | -0.05050797 |
| H | -6.04239869 | -3.74235101 | -1.38063097 |
| C | -8.21662669 | -3.97947801 | 1.21931003  |
| H | -7.95625469 | -3.00860301 | 3.12474603  |
| H | -8.19149369 | -4.79789401 | -0.77435797 |
| H | -9.16051769 | -4.43970401 | 1.48794903  |
| C | -0.57474269 | -2.77512501 | 0.52254703  |
| C | -0.01448069 | -2.57458901 | 1.79348503  |
| C | 0.11830231  | -3.58116301 | -0.39272097 |
| C | 1.19798131  | -3.17538401 | 2.13806603  |
| H | -0.52958469 | -1.95871201 | 2.51853603  |
| C | 1.33157931  | -4.17992801 | -0.05053797 |
| H | -0.29854069 | -3.74230901 | -1.38064797 |
| C | 1.87571531  | -3.97938201 | 1.21927403  |
| H | 1.61534631  | -3.00849601 | 3.12470503  |
| H | 1.85057731  | -4.79781301 | -0.77438797 |
| H | 2.81961531  | -4.43959301 | 1.48790903  |



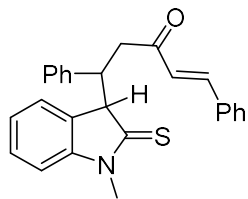

E= -1524.164265

H= -1524.163321

G= -1524.247851

|   |             |             |             |
|---|-------------|-------------|-------------|
| C | -4.75279119 | 0.03189793  | 0.00000000  |
| C | -5.22291419 | -1.09307907 | 1.00834300  |
| C | -0.88068319 | 0.03357293  | 0.42513300  |
| C | -2.25736119 | -0.43529407 | 0.16437100  |
| C | -3.36485119 | 0.58747893  | 0.38161600  |
| H | -4.62767019 | -0.50160807 | -0.94911000 |
| H | -0.75832719 | 1.06258693  | 0.74309700  |
| H | -3.34912019 | 0.88694793  | 1.43876700  |
| H | -3.14396119 | 1.47967993  | -0.22006200 |
| C | -5.70982019 | -0.54929607 | 2.35320000  |
| C | -6.44795919 | -1.81096907 | 0.47484200  |
| C | -6.63791619 | -2.57584007 | -0.66422500 |
| C | -7.51814219 | -1.57004307 | 1.34697100  |
| C | -7.91748919 | -3.09415007 | -0.92358000 |
| H | -5.81214019 | -2.77846907 | -1.33669100 |
| C | -8.79182919 | -2.06723507 | 1.10543200  |
| C | -8.97829919 | -2.83633607 | -0.05170800 |
| H | -8.08261619 | -3.70058207 | -1.80597900 |
| H | -9.61507219 | -1.87459307 | 1.78097500  |
| H | -9.96089819 | -3.23941207 | -0.26650100 |
| N | -7.04628319 | -0.80946107 | 2.44852000  |
| C | -7.90591519 | -0.40800207 | 3.56924900  |
| H | -7.27675419 | 0.11828293  | 4.28809300  |
| H | -8.69880919 | 0.25339093  | 3.20679200  |

|   |             |             |             |
|---|-------------|-------------|-------------|
| H | -8.34722119 | -1.29404907 | 4.03654300  |
| S | -4.75560319 | 0.21316593  | 3.55334300  |
| O | -2.50187919 | -1.60383307 | -0.19987800 |
| C | -5.80242419 | 1.11764893  | -0.19731400 |
| C | -5.94166819 | 2.18947293  | 0.69877500  |
| C | -6.65245719 | 1.06428793  | -1.31161900 |
| C | -6.90645519 | 3.17581793  | 0.48333200  |
| H | -5.30960719 | 2.24318093  | 1.57596700  |
| C | -7.61683019 | 2.05002793  | -1.52851800 |
| H | -6.55982419 | 0.23935393  | -2.00888700 |
| C | -7.74599219 | 3.11146793  | -0.63076400 |
| H | -6.99932319 | 3.99617293  | 1.18628100  |
| H | -8.26254719 | 1.98999793  | -2.39728600 |
| H | -8.49061519 | 3.88122093  | -0.79872300 |
| C | 0.15157781  | -0.81680507 | 0.27749800  |
| H | -0.11062219 | -1.82418007 | -0.04332200 |
| H | -4.37426319 | -1.76840407 | 1.14046400  |
| C | 1.57331381  | -0.55702607 | 0.49810400  |
| C | 2.49312881  | -1.59964407 | 0.27419100  |
| C | 2.06703581  | 0.69029693  | 0.93000900  |
| C | 3.85860681  | -1.40537907 | 0.47311800  |
| H | 2.12422781  | -2.56456307 | -0.05664900 |
| C | 3.43025981  | 0.88313493  | 1.12858100  |
| H | 1.37824581  | 1.50642393  | 1.11244600  |
| C | 4.33172281  | -0.16317007 | 0.90094300  |
| H | 4.55155881  | -2.21955207 | 0.29643700  |
| H | 3.79482781  | 1.84752093  | 1.46263400  |
| H | 5.39287281  | -0.00918607 | 1.05781200  |

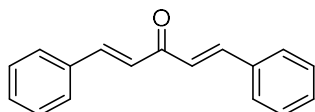

E= -730.994723

H= -730.993779

G= -731.055450

|   |              |             |             |
|---|--------------|-------------|-------------|
| C | -7.36842125  | 0.19138756  | 0.00000000  |
| H | -7.28216425  | 1.27465356  | -0.00008000 |
| C | -6.11123925  | -0.58247344 | -0.00014700 |
| C | -4.85405725  | 0.19138756  | 0.00000100  |
| H | -4.94031425  | 1.27465356  | -0.00007700 |
| C | -3.65129725  | -0.42655444 | 0.00021700  |
| H | -3.67530725  | -1.51587444 | 0.00027800  |
| C | -8.57118125  | -0.42655444 | 0.00021600  |
| H | -8.54717125  | -1.51587444 | 0.00027900  |
| C | -2.32322925  | 0.18601456  | 0.00036900  |
| C | -2.11358625  | 1.58331456  | 0.00031100  |
| C | -1.19100825  | -0.65715244 | 0.00058500  |
| C | -0.82294025  | 2.11075656  | 0.00046500  |
| H | -2.96398525  | 2.25699056  | 0.00014700  |
| C | 0.10166275   | -0.12869544 | 0.00073900  |
| H | -1.33668725  | -1.73347144 | 0.00063200  |
| C | 0.29062075   | 1.25785956  | 0.00068000  |
| H | -0.68089025  | 3.18683156  | 0.00041800  |
| H | 0.95804675   | -0.79528944 | 0.00090600  |
| H | 1.29369175   | 1.67216256  | 0.00079900  |
| C | -9.89924925  | 0.18601456  | 0.00036700  |
| C | -11.03147025 | -0.65715244 | 0.00058700  |
| C | -10.10889225 | 1.58331456  | 0.00030600  |
| C | -12.32414125 | -0.12869544 | 0.00074000  |
| H | -10.88579125 | -1.73347144 | 0.00063600  |
| C | -11.39953825 | 2.11075656  | 0.00045900  |

|   |              |             |            |
|---|--------------|-------------|------------|
| H | -9.25849325  | 2.25699056  | 0.00014000 |
| C | -12.51309925 | 1.25785956  | 0.00067700 |
| H | -13.18052525 | -0.79528944 | 0.00090900 |
| H | -11.54158825 | 3.18683156  | 0.00041000 |
| H | -13.51617025 | 1.67216256  | 0.00079600 |
| O | -6.11123925  | -1.84389044 | 0.00028000 |

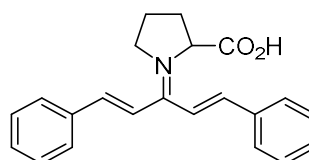

E= -1043.6002

H= -1043.5798

G= -1043.5964

|   |             |             |             |
|---|-------------|-------------|-------------|
| C | -1.47527915 | -1.22807016 | 0.00000000  |
| H | -1.69823315 | -2.09816916 | -0.58601200 |
| C | -2.58751415 | -0.28569116 | 0.09871300  |
| C | -3.90763715 | -0.95472616 | 0.03148900  |
| H | -3.99194015 | -1.70064016 | -0.73448700 |
| C | -4.85729115 | -0.79270516 | 0.94100100  |
| H | -4.68757215 | -0.11152016 | 1.75535200  |
| C | -0.34149115 | -1.12188316 | 0.69556300  |
| H | -0.19926015 | -0.28299716 | 1.35987300  |
| C | -6.14368015 | -1.51124816 | 0.98725600  |
| C | -6.70048015 | -2.12088616 | -0.13362900 |
| C | -6.82909915 | -1.57458916 | 2.19576400  |
| C | -7.90366315 | -2.79130516 | -0.04040200 |
| H | -6.20557115 | -2.05565416 | -1.08187600 |
| C | -8.03218015 | -2.24935616 | 2.28945000  |
| H | -6.41491115 | -1.10063416 | 3.06443500  |
| C | -8.57113315 | -2.86062816 | 1.17202300  |
| H | -8.32471215 | -3.25253916 | -0.91123100 |
| H | -8.54532215 | -2.29508616 | 3.22886800  |

|   |             |             |             |
|---|-------------|-------------|-------------|
| H | -9.50555015 | -3.38053816 | 1.24124300  |
| C | 0.77845785  | -2.06752716 | 0.71043000  |
| C | 1.85550085  | -1.73590316 | 1.52967000  |
| C | 0.82947185  | -3.24182616 | -0.03681500 |
| C | 2.96143085  | -2.56317116 | 1.60094800  |
| H | 1.80680885  | -0.82610116 | 2.09754100  |
| C | 1.93307685  | -4.06588516 | 0.03684300  |
| H | 0.01116885  | -3.51363116 | -0.67322700 |
| C | 3.00081985  | -3.72764916 | 0.85621700  |
| H | 3.78473985  | -2.29939616 | 2.23374400  |
| H | 1.96581685  | -4.96881816 | -0.53961700 |
| H | 3.85639985  | -4.37120216 | 0.91051800  |
| N | -2.47408315 | 0.98882584  | 0.23537300  |
| C | -3.58893315 | 1.99411084  | 0.26713800  |
| C | -1.19744515 | 1.78517284  | 0.33967100  |
| H | -3.61995315 | 2.36322984  | 1.27960400  |
| H | -4.51433615 | 1.55210984  | -0.05061800 |
| C | -3.04745915 | 3.07682284  | -0.66961000 |
| C | -1.54605215 | 3.14972684  | -0.30122800 |
| H | -0.40520715 | 1.25267484  | -0.15255200 |
| C | -0.92577815 | 1.94955184  | 1.89483900  |
| H | -3.55147015 | 4.01943184  | -0.51174500 |
| H | -3.17853215 | 2.76930184  | -1.69954400 |
| H | -1.39351015 | 3.91263384  | 0.44369200  |
| H | -0.93300615 | 3.34700584  | -1.16908100 |
| O | -1.72150615 | 2.71442484  | 2.46011400  |
| O | 0.01197385  | 1.25799284  | 2.34913500  |
